# Supplementary material for: Comparison of Protein and mRNA Expression Evolution in Humans and Chimpanzees
Source: PLoS One. 2007 Feb 14;2(2):e216. doi: 10.1371/journal.pone.0000216 (PMC1789144; doi:10.1371/journal.pone.0000216)
Supplement: Table S1 — GO categories with significant overrepresentation of 98 genes detected on the protein and mRNA levels (0.04 MB XLS) [file pone.0000216.s009.xls]

## Sheet: Sheet1
Table S1. GO categories with significant overrepresentation of 98 genes detected on the protein and mRNA levels
GO ID	GO category	p-value*
GO:0006099	tricarboxylic acid cycle	8.17e-07
GO:0006081	aldehyde metabolism	8.43e-07
GO:0006096	glycolysis	3.24e-06
GO:0006760	folic acid and derivative metabolism	8.72e-05
GO:0006631	fatty acid metabolism	0.000246704
GO:0006979	response to oxidative stress	0.00143622
GO:0006094	gluconeogenesis	0.00177879
GO:0006100	tricarboxylic acid cycle intermediate metabolism	0.00177879
GO:0006635	fatty acid beta-oxidation	0.00216296
GO:0006547	histidine metabolism	0.00267711
GO:0043648	dicarboxylic acid metabolism	0.00267711
GO:0006730	one-carbon compound metabolism	0.00553282
GO:0019748	secondary metabolism	0.00628664
GO:0006000	fructose metabolism	0.00725466
GO:0006206	pyrimidine base metabolism	0.00725466
GO:0006563	L-serine metabolism	0.00922651
GO:0009109	coenzyme catabolism	0.0167276
GO:0019752	carboxylic acid metabolism	0.0181092
GO:0044238	primary metabolism	0.0239084
GO:0051186	cofactor metabolism	0.0425114
GO:0009059	macromolecule biosynthesis	0.0438023
* p-valie for overrepresentation of genes in the GO categories after the refinement was calculated in the hypergeometric test as described elsewhere (http://func.eva.mpg.de/). The cutoff of five genes was used for the minimal number of genes per GO category.
