# Supplementary material for: Comparison of Protein and mRNA Expression Evolution in Humans and Chimpanzees
Source: PLoS One. 2007 Feb 14;2(2):e216. doi: 10.1371/journal.pone.0000216 (PMC1789144; doi:10.1371/journal.pone.0000216)
Supplement: Table S2 — Sample information (0.02 MB XLS) [file pone.0000216.s006.xls]

## Sheet: Sheet1
Table S2. Sample information
Individual	mRNA data
	Pool$	Sex	Age	28S/18S*
Chimpanzee 1	c1	m	7	1.7
Chimpanzee 2	c1	m	34	1.4
Chimpanzee 3	c2	f	36	1.6
Chimpanzee 4	c2	f	59	1.5
Chimpanzee 5	c3	f	58	1.4
Chimpanzee 6	c3	m	12	1.5
Human 1	h1	m	adult	1.4
Human 2	h1	f	27	1.6
Human 3	h2	f	29	1.5
Human 4	h2	m	29	1.5
Human 5	h3	m	adult	1.6
Human 6	h3	m	21	1.7
Individual	Protein data
	Pool$$	Sex	Age	28S/18S
Chimpanzee 1	c1	f	59	1.5
Chimpanzee 2	c1	f	58	1.4
Chimpanzee 3	c2	f	36	1.6
Chimpanzee 4	c2	m	26	1.6
Chimpanzee 5	c3	m	25	1.5
Chimpanzee 6	c3	m	34	1.4
Human 1	h1	f	38	1.9
Human 2	h1	m	53	1.7
Human 3	h2	m	47	1.8
Human 4	h2	m	52	1.1
Human 5	h3	m	47	1.3
Human 6	h3	m	48	2.1
* Ribosomal RNA bands ratio was measured using Agilent 2100 Bionalyzer system.
$ For mRNA data, "Pools" indicate samples that were measured individually and then combined on the data analysis level. The "pooling" of mRNA measurements from two individuals was done to make mRNA variation estimate more comparable to those obtained for pooled protein data.
$$ For protein data, "Pools" indicate pairs of individual samples that were combined prior to protein expression measurements. For technical reasons we were unable to measure all 12 samples used in this study individually. Since main focus of this study is comparison between the species rather than estimation of individual variation, we pooled every two individuals in order to obtain more robust …
Shading indicates individuals used for both mRNA and protein expression analyses.
