# Supplementary material for: Comparison of Protein and mRNA Expression Evolution in Humans and Chimpanzees
Source: PLoS One. 2007 Feb 14;2(2):e216. doi: 10.1371/journal.pone.0000216 (PMC1789144; doi:10.1371/journal.pone.0000216)
Supplement: Table S3 — mRNA and protein expression levels for 143 proteins detected in the first set of experimental replicates (0.08 MB XLS) [file pone.0000216.s007.xls]

## Sheet: data.set.1
Table S3. mRNA and protein expression levels for 143 proteins detected in the first set of experimental replicates
RefSeq. ID	UniProt SwissProt	Protein Name	mRNA expression levels*												Protein expression levels**
			C1	C2	C3	C4	C5	C6	H1	H2	H3	H4	H5	H6	c1	c2	c3	h1	h2	h3
NP_000010	P24752	Acetyl-CoA acetyltransferase, mitochondrial precursor	8.32595	8.19273	8.10708	8.48156	7.99014	8.24859	8.78216	8.59592	8.48299	8.52647	8.34797	8.38534	0.0840643	0.163499	0.823749	-1.21759	-0.535332	0.378512
NP_000021	P21549	Serine--pyruvate aminotransferase	9.67506	9.04974	8.92981	9.06493	8.82446	9.03599	12.3202	11.7557	11.9576	11.6841	11.6508	11.2071	0.831877	2.86196	0.536053	-1.32193	-0.473931	-0.395929
NP_000022	P13716	Delta-aminolevulinic acid dehydratase	11.0976	10.8013	10.6606	11.2355	10.0974	10.3009	11.0472	10.8652	10.6373	11.3426	10.4974	10.5018	-1.32193	-0.915936	-0.168123	0.111031	-0.321928	0.189034
NP_000026	P05062	Fructose-bisphosphate aldolase B	10.5731	10.9991	10.5498	10.4567	10.6259	10.7929	10.857	10.9479	11.1074	11.0051	10.9713	10.9441	0.432959	-0.251539	0.0703893	-0.0892673	-0.643856	-0.0439433
NP_000033	P02749	Beta-2-glycoprotein 1 precursor	12.1317	12.0754	11.9171	12.3207	12.0558	11.7605	11.998	12.2591	12.2286	12.0963	12.1563	12.1034	-0.321928	0.594549	0.286881	-0.514573	-0.37707	-0.0740006
NP_000062	P35520	Cystathionine beta-synthase	10.752	10.4308	10.9409	10.0163	10.7766	10.5075	10.3232	10.2073	10.5495	10.7387	10.2268	10.2638	-0.136062	1.05658	0.83996	-1	-1.02915	-0.473931
NP_000117	P13804	Electron transfer flavoprotein subunit alpha, mitochondrial precursor	13.1009	12.7894	12.5646	12.9287	12.1223	12.9059	12.4996	12.2452	12.3312	12.6682	12.0813	12.2008	0.918386	-0.304006	0.956057	-0.434403	0.0143553	1.4489
NP_000124	P00740	Coagulation factor IX precursor	13.1886	13.3601	13.3395	13.8349	13.5969	12.9291	13.7428	13.6431	13.2489	13.0981	13.2326	13.1366	-0.494109	0.275007	0.0285692	-1.2863	0.941106	0.31034
NP_000173	P40939	Trifunctional enzyme subunit alpha, mitochondrial precursor	12.5201	11.4696	11.1031	11.1447	11.031	10.9929	11.6873	11.5605	11.7042	12.1007	11.7618	11.4738	4.19061	3.34056	1.31034	-1.08927	-0.643856	-0.643856
NP_000282	P00558	Phosphoglycerate kinase 1	9.76579	9.46622	9.64102	9.42041	8.50086	8.98481	9.79139	9.66916	9.86863	9.9131	9.51803	9.75455	-0.395929	-0.514573	-0.184425	0.454176	0.0143553	0.298658
NP_000356	P60175	Triosephosphate isomerase	11.7379	11.665	12.6474	11.9543	11.8959	11.8538	11.8432	11.6648	12.0164	12.1082	12.3189	12.2396	-0.136062	-0.643856	0.0426443	0.400538	-0.234465	0.137504
NP_000378	O43772	Mitochondrial carnitine/acylcarnitine carrier protein	10.6907	9.71109	8.37076	10.5863	9.351	10.7407	11.1666	10.7033	10.9773	11.2843	10.6524	11.4025	1.20789	0	0.62293	-0.340075	-0.0291463	-0.358454
NP_000405	P51659	Peroxisomal multifunctional enzyme type 2	12.2419	11.9643	12.1711	12.5767	11.4654	12.212	12.2359	11.8923	11.4498	11.9098	11.5226	11.5657	0.495695	0.275007	0.536053	-1.32193	-0.321928	0.516015
NP_000445	P60052	Superoxide dismutase [Cu-Zn]	14.1475	14.1826	13.8498	14.1312	13.6933	13.9118	14.1923	14.176	14.0853	14.1444	14.1155	14.1037	0.214125	-0.643856	-0.68966	0.422233	0.0426443	0.422233
NP_000468	P02768	Serum albumin precursor	12.3782	12.6691	11.9802	12.4822	12.8028	11.9779	12.2452	12.5001	12.8323	12.8793	13.0094	12.436	0.137504	-0.340075	-0.68966	0.443607	0.669027	-0.136062
NP_000479	P01008	Antithrombin-III precursor	14.4066	14.2978	14.2256	14.323	14.098	14.2186	14.2642	14.3045	14.218	14.2926	14.0239	14.1152	-0.836501	-0.736966	-0.556393	0.250962	0.0143553	0.565597
NP_000498	P09467	Fructose-1,6-bisphosphatase 1	14.0772	12.9148	12.8096	12.2359	12.7711	13.5473	13.4037	13.168	13.2551	13.3632	13.3996	12.5211	1.42223	-0.168123	0.0840643	0.0426443	-0.340075	0.226509
NP_000499	P02671	Fibrinogen alpha chain precursor	12.0084	12.7672	12.7644	12.6942	12.7426	12.383	12.6142	12.443	12.5715	12.2951	12.6875	11.5358	-0.104697	-0.321928	-0.434403	0.713696	-0.0439433	0.604071
NP_000509	P68873	Hemoglobin subunit beta	12.1808	13.0572	11.4502	11.8536	10.7425	13.2345	11.5988	10.5342	12.5519	13.5162	12.9494	12.112	0.555816	-0.120294	0.111031	0.226509	0.356144	-1
NP_000598	P02763	Alpha-1-acid glycoprotein 1 precursor	13.7516	14.5716	14.4507	14.6569	14.5975	14.493	14.586	14.3194	14.6142	14.3547	14.5864	14.5176	0.0143553	-0.358454	-0.0439433	0.757023	0.505891	1.09085
NP_000599	P19652	Alpha-1-acid glycoprotein 2 precursor	13.1475	14.2097	14.0234	14.3551	14.018	14.0721	14.4061	14.2863	14.4766	14.3162	14.3659	14.3137	-0.152003	-0.556393	1.03562	0.286881	-0.358454	0.238787
NP_000604	P02790	Hemopexin precursor	14.5564	14.5269	14.6308	14.6343	14.2888	14.5483	14.4263	14.3368	14.472	14.4421	14.4005	14.1583	0.0565835	-0.494109	-0.556393	0.321928	-0.200913	0.516015
NP_000654	P80404	4-aminobutyrate aminotransferase, mitochondrial precursor	10.361	10.1901	9.81029	9.62719	9.72324	9.42561	11.6024	11.2911	11.469	11.5665	11.1991	11.2727	0.526069	0.704872	0.163499	-0.152003	-1.59946	-0.514573
NP_000659	Q5I0R0	alcohol dehydrogenase 1B (class I), beta polypeptide	11.7744	12.3582	10.419	11.8956	12.0677	11.4776	11.5316	11.5144	11.1393	11.4567	11.2336	10.9786	1.20789	-0.514573	-1.02915	1.27501	0.545968	0.879706
NP_000661	P08319	Alcohol dehydrogenase 4	8.27627	8.60205	6.16193	9.78708	9.23964	7.95143	10.5015	10.4172	10.3896	10.1297	10.3041	10.1992	1	0.333424	1.15056	-0.358454	-1.55639	-0.0892673
NP_000680	P00352	Retinal dehydrogenase 1	12.7948	13.101	10.6322	13.6219	12.9079	10.9733	13.2777	13.2669	12.4957	12.7838	12.1987	12.5952	-0.395929	-0.736966	-0.943416	1.72247	0.903038	1.04264
NP_000681	P05091	Aldehyde dehydrogenase, mitochondrial precursor	13.6544	13.6366	13.3389	13.6864	13.5484	13.6572	13.6484	13.6047	13.707	14.0102	13.7562	13.7952	-0.454032	-0.0892673	-0.234465	-0.104697	-0.234465	0.650765
NP_000745	P21964	Catechol O-methyltransferase	9.95611	10.6942	9.13244	10.1013	10.1473	10.0237	10.083	10.4265	10.8951	10.6992	10.5636	11.4502	3.87676	-0.0740006	-2.64386	3.27798	-0.152003	0.0565835
NP_000884	P01042	Kininogen-1 precursor	13.6796	13.8388	13.1018	13.8731	13.8992	13.4581	14.13	14.1944	14.0902	13.8981	14.0751	14.0961	-0.304006	0.400538	-0.152003	-0.643856	-0.340075	0.378512
NP_000911	P11498	Pyruvate carboxylase, mitochondrial precursor	11.5999	11.6906	11.3156	11.0439	11.5567	11.7939	11.0508	10.5967	10.9876	10.7294	11.2287	10.22	-0.321928	-0.0740006	-0.836501	0.0426443	-0.0588937	0.344828
NP_000933	P23284	Peptidyl-prolyl cis-trans isomerase B precursor	12.5523	12.4699	12.6671	12.3959	12.7172	13.3302	11.7563	11.8711	12.4526	12.251	12.5672	12.386	0.0426443	0.432959	-0.494109	-0.340075	-0.251539	0.298658
NP_000969	P62832	60S ribosomal protein L23	12.9981	12.8789	12.3484	13.1047	13.0091	12.5518	13.2346	13.3837	13.2609	12.9408	13.2449	13.3724	-0.434403	-0.0588937	0.454176	-0.514573	-0.434403	0.941106
NP_000970	Q07020	60S ribosomal protein L18	13.5637	13.4786	13.5607	13.4651	13.5001	13.9422	13.2576	13.3296	13.5347	13.5134	13.5923	13.7888	0.815575	0.263034	0.432959	-0.473931	-0.943416	0.333424
NP_000980	P62890	60S ribosomal protein L30	8.95642	8.84495	8.60821	9.08305	8.82218	8.87299	9.30327	9.30361	9.28924	9.12609	9.23882	9.20818	-0.286304	0.111031	0.443607	-0.621488	-0.556393	1.08406
NP_000986	P49207	60S ribosomal protein L34	12.8913	12.7653	12.5457	13.1467	13.0789	12.8898	13.1108	13.2718	13.2727	12.9138	13.3431	13.1739	0.411426	0.604071	0.464668	1.52607	-0.836501	-0.556393
NP_000993	P05388	60S acidic ribosomal protein P0	13.4471	13.5735	13.4503	13.3776	13.6127	14.1165	13.4861	13.6012	13.4957	13.6118	13.5444	13.8799	-0.0740006	0.344828	0.613532	0.15056	-0.37707	0.0285692
NP_000997	P61247	40S ribosomal protein S3a	12.5308	12.3258	12.1348	12.7202	11.8696	12.3364	13.0109	13.1783	12.9151	12.6206	12.7699	12.755	-0.785875	-0.0439433	-0.514573	-0.358454	-0.234465	0.847997
NP_000998	P62703	40S ribosomal protein S4, X isoform	12.9306	12.7384	12.3853	13.5325	13.4081	12.9795	13.2034	13.6622	13.6392	12.9015	13.3252	13.3259	0.0565835	-0.136062	0.378512	-0.184425	-0.473931	0.0285692
NP_001000	P46782	40S ribosomal protein S5	13.082	13.0599	13.0374	12.6169	12.8015	13.4166	12.846	13.0879	13.2363	13.2065	13.1694	13.2743	1.07039	0.31034	-0.0144996	-0.340075	-0.251539	-0.473931
NP_001001	P62755	40S ribosomal protein S6	8.42828	8.38252	8.20921	8.40994	8.36431	8.34048	8.48154	8.45557	8.37252	8.36712	8.41777	8.41312	0.250962	-0.286304	0.389567	-0.152003	-0.340075	0.632268
NP_001003	P62243	40S ribosomal protein S8	8.32294	8.25695	8.14668	8.14341	8.14698	8.2813	8.32649	8.37463	8.2388	8.19521	8.22872	8.2408	0.275007	0.485427	0.298658	-0.666576	-0.268817	0.333424
NP_001012	P08708	40S ribosomal protein S17	7.99378	7.99263	7.87415	7.92879	8.05503	8.0821	8.03473	8.05582	8.01877	7.94807	8.068	8.10795	-2.32193	0.321928	0.124328	-0.395929	-1.4344	0.555816
NP_001015	P63221	40S ribosomal protein S21	8.47306	8.55922	8.64603	8.48175	8.3641	8.53616	8.63464	8.66138	8.72157	8.74323	8.59026	8.63212	-0.0439433	-0.286304	0.432959	0.286881	1.04264	0.575312
NP_001054	P02787	Serotransferrin precursor	11.1784	11.3124	11.2541	11.111	10.9894	10.625	12.2015	12.0521	12.5599	12.6891	12.2794	12.1194	0.298658	0.344828	-0.454032	-0.286304	-0.68966	-0.286304
NP_001076	P01011	Alpha-1-antichymotrypsin precursor	14.3967	14.8621	14.855	14.5397	14.7844	14.7361	14.3127	14.1048	14.4664	14.0024	14.3368	14.0036	-0.643856	-1.2863	-1	0.389567	1.74846	2.51349
NP_001089	Q99798	Aconitate hydratase, mitochondrial precursor	11.0688	10.918	11.404	10.2599	9.89915	11.4621	10.458	10.3647	10.6437	10.8454	10.5669	11.0358	-0.666576	-0.0892673	-0.434403	0.536053	0.378512	0.378512
NP_001093	P12814	Alpha-actinin-1	9.56442	9.71085	9.86899	8.73833	9.4715	9.83859	9.46441	9.31912	9.77777	9.3069	9.80165	9.31324	0.0840643	0.495695	1.24489	-0.152003	-0.643856	-0.836501
NP_001144	P09525	Annexin A4	10.8742	11.4625	10.8355	11.6111	10.3718	11.773	10.8722	10.7633	10.4298	10.9294	10.7178	10.4596	0.189034	-0.184425	-0.340075	-0.0740006	-0.321928	0.443607
NP_001176	P25311	Zinc-alpha-2-glycoprotein precursor	13.3078	13.2732	13.3679	13.0663	13.3465	12.7544	13.1272	13.0676	13.1527	13.1986	13.0758	12.9733	0.505891	-0.217591	-0.0439433	0.298658	0.263034	0.356144
NP_001350	Q16698	2,4-dienoyl-CoA reductase, mitochondrial precursor	9.26198	9.46768	8.9046	9.47794	9.16973	8.87062	9.63896	9.66962	9.295	9.62528	9.2001	9.48542	-0.268817	-0.0144996	-0.0588937	-0.888969	-0.104697	0.411426
NP_001447	P21333	Filamin-A	8.32519	8.05603	8.22232	7.80633	8.46618	8.537	7.65586	7.80239	8.00771	7.94705	8.37732	7.99204	-0.943416	-0.0439433	0.356144	0.275007	0.238787	-1.2863
NP_001598	P09110	3-ketoacyl-CoA thiolase, peroxisomal precursor	13.0339	12.1581	11.3268	12.33	12.3348	12.2105	12.7614	12.6566	12.5943	12.9711	12.6614	12.4213	-0.0740006	-0.104697	0.378512	-0.943416	-0.395929	-0.0892673
NP_001600	P45954	Short/branched chain specific acyl-CoA dehydrogenase, mitochondrial precursor	10.6442	10.6822	9.36084	10.4366	8.44759	10.3314	11.6813	11.6606	10.8365	11.2022	11.0881	10.8686	-0.943416	-0.836501	-0.761213	1.12433	1.48543	0.963474
NP_001613	P02765	Alpha-2-HS-glycoprotein precursor	13.6756	12.8951	12.802	13.8323	13.5082	13.0533	13.9587	14.0779	14.1804	14.1323	14.0319	13.9827	-1.21759	0.333424	1.72683	-0.37707	-0.666576	0.321928
NP_001616	Q5REI7	Adenylate kinase isoenzyme 2, mitochondrial	8.90695	9.01909	8.6042	9.21704	9.21786	9.40634	9.27353	9.27241	9.13205	9.45372	9.16415	9.66538	0.263034	-0.395929	-0.321928	-0.736966	0.584963	0.298658
NP_001624	P02760	AMBP protein precursor	14.5824	14.4329	14.2272	14.4957	14.588	14.4366	14.4798	14.5461	14.5298	14.5367	14.5559	14.5152	-0.556393	0.124328	0.344828	-0.234465	-0.286304	0.0976108
NP_001702	P21810	Biglycan precursor	9.94666	9.4151	9.06965	9.5074	10.2875	9.92386	9.77831	10.3907	10.5642	10.3779	10.1309	9.61109	0.411426	0.176323	3.9782	-0.713119	-0.556393	-0.434403
NP_001704	Q93088	Betaine--homocysteine S-methyltransferase	13.7914	13.7352	13.8906	13.7274	13.2696	13.7824	13.3445	13.2199	13.1426	13.3819	13.2179	12.6516	-1.08927	-0.915936	-0.943416	-0.0892673	-2.55639	0.263034
NP_001743	P04040	Catalase	10.9828	10.8242	9.73494	10.6834	10.3235	10.1159	10.7203	10.6438	10.4345	11.0196	10.4242	10.6429	-0.915936	-0.577767	0.0426443	-0.395929	0.214125	0.454176
NP_001748	P16152	Carbonyl reductase [NADPH] 1	10.4276	10.2349	9.50953	10.7518	9.96179	10.3762	10.1438	9.9952	10.1145	10.1978	9.82574	9.23157	-0.358454	-0.621488	-0.666576	1.04264	0.545968	1.02857
NP_001854	P14854	Cytochrome c oxidase subunit VIb isoform 1	11.0537	11.3601	10.4362	10.9635	11.4674	9.63333	10.8202	10.8662	11.1936	11.1095	11.1929	11.1857	-0.358454	-0.200913	0.189034	-0.621488	-0.0588937	0.0143553
NP_001866	P31327	Carbamoyl-phosphate synthase [ammonia], mitochondrial precursor	13.5135	13.1294	12.7601	12.795	11.6068	12.12	13.3122	13.3534	12.9699	13.1282	12.714	12.8613	-0.0588937	0.0840643	-0.251539	0.201634	-0.152003	0.226509
NP_001894	P35221	Alpha-1 catenin	8.32035	8.39302	9.03278	8.14342	8.15233	8.90775	8.5091	8.43248	8.73816	8.88451	8.53928	8.38364	-0.888969	0.757023	0.31034	-0.915936	-0.577767	-0.152003
NP_001911	Q5R1V9	Decorin precursor	11.7401	11.049	9.94786	10.833	9.97239	10.3589	11.1542	11.3354	11.6087	11.1278	11.7209	10.4775	-0.304006	0.0976108	0.344828	-0.494109	-0.0740006	0.111031
NP_001952	Q5R8Z3	Elongation factor 2	13.1958	13.2453	13.1932	12.9087	13.3927	13.5018	13.3633	13.4013	13.2381	13.2562	13.4356	13.5556	0.201634	-0.152003	0.344828	-0.286304	-0.152003	0.201634
NP_001957	Q08426	Peroxisomal bifunctional enzyme	11.9225	11.2677	9.74241	12.0162	10.9901	11.1448	12	11.9526	11.4052	11.8147	11.6109	11.5854	-0.136062	1.04264	1.26903	-1.25154	0.286881	0.286881
NP_001986	P33121	Long-chain-fatty-acid--CoA ligase 1	12.9008	12.0796	12.9768	12.8841	12.411	13.4764	13.1177	12.8845	12.9868	13.1119	12.4876	13.0575	0.333424	0.62293	0.847997	-1.152	-0.37707	-0.268817
NP_002017	P02751	Fibronectin precursor	11.0597	10.9046	10.5394	10.7847	11.2375	10.3629	11.3619	11.0105	10.8465	11.0121	11.1869	10.9268	0.111031	0.0976108	0.695994	-0.643856	-1.59946	-0.68966
NP_002037	P04406	Glyceraldehyde-3-phosphate dehydrogenase	13.4059	13.7282	14.1813	13.1974	12.793	13.9023	13.4029	13.0499	13.2604	13.3976	13.1325	13.5944	-0.321928	0.0565835	0.0840643	0.286881	-0.0892673	-0.0588937
NP_002147	P10809	60 kDa heat shock protein, mitochondrial precursor	9.9471	9.99335	10.8086	10.02	10.534	10.7547	10.6327	10.2373	9.74588	10.2849	9.57021	10.7403	-0.304006	0.0426443	0.111031	0.0976108	-0.136062	0.378512
NP_002159	P48735	Isocitrate dehydrogenase [NADP], mitochondrial precursor	10.3191	11.7123	11.5295	11.31	11.9667	11.483	10.9535	10.1855	11.0161	10.5148	11.5314	10.6205	-0.37707	-0.577767	-0.136062	-0.286304	-0.120294	0.0840643
NP_002558	P30086	Phosphatidylethanolamine-binding protein 1	13.0582	13.1617	11.9428	12.8363	13.5908	12.6619	13.2915	13.3544	13.2402	13.3109	13.5764	13.4041	0.378512	-0.136062	-0.514573	0.111031	-0.268817	0.464668
NP_002624	P36871	Phosphoglucomutase-1	13.3161	13.2486	13.2151	13.4901	12.9055	13.1903	13.2503	13.269	13.3985	13.4303	13.2965	13.0875	0.333424	-0.943416	-0.556393	1.15704	0.0426443	1.22033
NP_002716	P51888	Prolargin precursor	9.2202	9.03051	9.25289	8.48256	8.63776	9.12006	8.64959	8.77655	8.71545	8.59639	8.9641	8.51041	-0.268817	0.933573	1.04264	-0.785875	0.214125	-0.643856
NP_002769	P07602	Proactivator polypeptide precursor	12.5044	12.0467	12.7747	11.5559	11.6475	12.5436	12.0991	12.1624	12.3095	12.3613	12.0273	11.8737	-0.0588937	-0.556393	0.250962	0.124328	0.443607	0.176323
NP_002854	P06737	Glycogen phosphorylase, liver form	8.76718	8.85572	8.92873	8.88183	8.93485	8.56068	8.2079	8.04509	8.10113	8.53304	8.49793	9.24291	-0.340075	-0.666576	-0.556393	0.555816	0.0426443	0.678072
NP_002943	P15880	40S ribosomal protein S2	10.2216	10.3515	10.3887	10.2119	10.2617	10.5077	9.92433	10.0221	10.0951	10.0563	10.0949	10.2025	0.495695	0	0.495695	-0.454032	-0.434403	-0.0291463
NP_002955	P05109	Protein S100-A8	7.41907	8.14452	11.785	7.29831	7.44903	10.259	9.30052	7.45528	10.905	9.7035	10.4556	7.50804	1.43296	0.83996	1.31615	0.773996	0.298658	-1.59946
NP_002991	P21912	Succinate dehydrogenase [ubiquinone] iron-sulfur protein, mitochondrial precursor	11.213	11.1819	10.7422	11.1593	11.0648	10.9454	10.2325	9.98872	10.6586	10.8446	10.3517	10.6391	-0.761213	0.400538	0.659925	-0.736966	-0.251539	0.15056
NP_003118	Q13813	Spectrin alpha chain, brain	9.86665	9.88319	9.72445	8.92476	9.76576	10.004	8.89505	8.97143	8.93066	9.08139	9.64425	9.50876	0.189034	0.214125	0.137504	-0.810966	-0.494109	0.137504
NP_003119	Q01082	Spectrin beta chain, brain 1	8.57848	8.80826	8.66672	8.51564	8.85072	8.90181	8.51935	8.56589	8.55831	8.69529	8.79478	8.80985	-0.395929	-0.0291463	0.275007	-0.340075	-0.0588937	0.0143553
NP_003357	P22695	Ubiquinol-cytochrome-c reductase complex core protein 2, mitochondrial precursor	9.25866	8.95066	8.9667	8.90068	8.69672	8.42878	9.08404	8.88327	9.03635	9.23117	8.88884	9.01445	-0.0291463	0.238787	1.1177	-0.535332	0.545968	0.0565835
NP_003365	P21796	Voltage-dependent anion-selective channel protein 1	10.0216	10.3153	10.5578	10.1755	9.64245	10.7196	10.9842	10.7784	10.5962	10.9069	10.8403	10.9264	-0.494109	0.286881	0.263034	-0.836501	-0.915936	0.111031
NP_003371	P08670	Vimentin	12.5048	11.587	12.1903	10.68	10.6896	12.1332	11.2587	11.6835	11.7388	11.2278	11.6251	10.3635	-0.251539	0.400538	0.594549	0.0976108	0.757023	-1.02915
NP_003840	P53597	Succinyl-CoA ligase [GDP-forming] subunit alpha, mitochondrial precursor	11.9708	12.0577	12.1717	12.2492	11.6496	12.1679	12.2553	12.1959	12.2052	12.2061	12.0964	12.4723	-0.321928	0.0565835	-0.0291463	-0.434403	-0.358454	0.111031
NP_004042	Q02338	D-beta-hydroxybutyrate dehydrogenase, mitochondrial precursor	8.95951	8.60014	8.63622	8.63829	8.36561	8.79752	8.7338	8.66916	8.93374	9.23289	9.08256	8.91703	0.464668	-0.104697	0.536053	-0.304006	-0.152003	0.238787
NP_004075	P59665	Neutrophil defensin 1 precursor	6.83821	7.1136	8.49512	6.55681	6.49797	6.61366	7.01308	6.6132	10.5969	7.66138	7.47777	6.89405	1.58496	0.0565835	1.01436	0.298658	0.422233	-1.8365
NP_004083	P30084	Enoyl-CoA hydratase, mitochondrial precursor	13.5847	13.879	13.5969	13.5454	13.6346	13.7447	13.3917	13.3285	13.4536	13.6731	13.5003	13.7777	-0.321928	-0.358454	-0.37707	-0.152003	-0.0291463	0.847997
NP_004100	P10109	Adrenodoxin, mitochondrial precursor	10.0689	10.0768	9.9561	10.0387	9.40396	10.1823	10.0713	10.0579	10.0538	10.4062	10.0005	10.527	0.124328	0.201634	0.516015	-0.666576	-0.643856	0.0285692
NP_004160	P34896	Serine hydroxymethyltransferase, cytosolic	9.72236	9.71776	9.71544	9.48044	9.61174	9.76384	9.24872	9.05934	9.32926	9.41243	9.21942	9.46053	0.0426443	-0.168123	-0.37707	0.0143553	0.454176	0.62293
NP_004199	O95831	Programmed cell death protein 8, mitochondrial precursor	8.60825	8.76182	8.47372	9.10819	8.65246	8.84841	8.6091	8.38474	8.86564	8.95931	8.77958	8.90848	-0.184425	1.19535	0.15056	-0.454032	-0.0439433	0.411426
NP_004360	P12111	Collagen alpha-3(VI) chain precursor	11.2335	9.06343	8.99521	9.81747	9.98994	9.80547	9.22566	9.40972	9.34759	9.04256	9.53559	9.30973	-0.621488	0.31034	2.71149	0.863938	-0.736966	0.263034
NP_004484	Q99714	3-hydroxyacyl-CoA dehydrogenase type-2	12.6211	12.3364	11.5138	12.2644	12.3138	12.6546	11.8521	11.6027	12.0684	12.26	11.9181	12.1563	-0.286304	-0.184425	0.333424	0.0703893	-0.0740006	0.505891
NP_004543	O43920	NADH-ubiquinone oxidoreductase 15 kDa subunit	11.0744	11.1814	10.6277	11.4117	12.0287	10.4556	11.3749	11.4028	11.999	11.3337	11.8055	11.81	0	-0.535332	0.505891	-1.152	-0.473931	0
NP_004544	O75380	NADH-ubiquinone oxidoreductase 13 kDa-A subunit, mitochondrial precursor	10.9647	11.0829	11.1685	10.8567	11.2126	11.4827	10.4576	10.1769	10.8637	10.8808	11.1931	10.917	-0.136062	-0.286304	0.83996	-0.251539	-0.395929	0.584963
NP_004578	Q9P2E9	Ribosome-binding protein 1	9.84119	9.87661	9.99733	9.88742	10.4356	10.2951	9.69125	9.76167	10.209	9.74419	10.3213	10.253	-0.168123	-0.713119	-0.136062	-0.168123	-0.0740006	0.0285692
NP_004588	P62317	Small nuclear ribonucleoprotein Sm D2	10.9795	11.0681	11.123	10.5289	10.7042	11.5702	10.6511	10.8276	11.3633	11.0438	11.3704	10.9539	0.321928	0.526069	1.69153	0.0565835	-0.434403	0.584963
NP_004604	P21980	Protein-glutamine gamma-glutamyltransferase 2	8.63606	9.76799	10.9419	8.60141	8.32098	10.3141	8.44318	8.03952	8.5948	8.3237	7.95459	10.0293	-0.0892673	0.632268	0.0143553	-0.599462	-0.304006	0
NP_004896	P30041	Peroxiredoxin-6	10.5233	10.6382	9.90714	10.459	11.1772	10.4671	10.7565	10.5177	10.7709	10.9917	9.81747	9.88712	0.275007	-0.971431	-0.454032	1.72247	0.263034	0.687061
NP_004915	O43707	Alpha-actinin-4	10.033	9.74322	10.1524	10.2146	10.1581	10.1657	9.88001	9.8934	10.1146	10.1394	10.346	11.1478	0.687061	0.286881	0.516015	-0.152003	0.0285692	-0.37707
NP_005132	P02675	Fibrinogen beta chain precursor	14.3279	14.4603	14.4752	14.4442	14.3227	14.4591	14.4174	14.342	14.3197	14.1858	14.2444	13.8838	-0.761213	-0.136062	-0.251539	0.464668	0.286881	0.432959
NP_005134	P00738	Haptoglobin precursor	14.6144	14.7217	14.6174	14.6308	14.7102	14.6193	14.6159	14.479	14.5895	14.5383	14.6349	14.4521	0.31034	-0.736966	-0.395929	0.0285692	0.176323	0.485427
NP_005262	P00367	Glutamate dehydrogenase 1, mitochondrial precursor	12.0422	12.4896	12.3929	13.0404	11.841	12.3526	12.7765	12.8293	12.5771	12.8355	12.3418	13.0641	-0.836501	-0.37707	-0.340075	-0.0588937	0.201634	0.0285692
NP_005304	P30101	Protein disulfide-isomerase A3 precursor	10.2887	10.3027	10.6021	10.5553	10.22	10.9443	10.6891	10.5369	10.5434	10.4821	10.3058	10.5879	-0.217591	0.464668	-0.0144996	-0.395929	-0.577767	0.176323
NP_005317	Q16775	Hydroxyacylglutathione hydrolase	12.6507	12.84	12.1367	12.3798	13.3148	12.7089	11.604	11.7656	11.8589	12.037	11.9644	12.3917	0.250962	-0.321928	0.378512	0.124328	-0.120294	0.815575
NP_005580	Q02252	Methylmalonate-semialdehyde dehydrogenase [acylating], mitochondrial precursor	11.5791	11.5431	11.3217	10.7467	10.7563	10.6348	11.4352	11.3489	11.319	11.4203	11.1364	11.059	0.111031	-0.0892673	0.111031	0.594549	0.0143553	-0.251539
NP_005827	P52758	Ribonuclease UK114	10.5906	10.9676	10.2584	10.7855	9.98058	9.84955	11.336	11.2767	11.2561	11.2398	10.6846	11.2379	0.0703893	-0.599462	-0.599462	0.286881	-0.0588937	1
NP_005871	O60884	DnaJ homolog subfamily A member 2	7.86673	7.91109	7.72602	8.28849	7.33756	7.96028	8.18442	8.1957	8.06416	7.96839	7.94324	7.9175	-0.643856	-0.514573	0.757023	-0.494109	-0.340075	0.0840643
NP_005887	O75874	Isocitrate dehydrogenase [NADP] cytoplasmic	10.3327	9.66398	8.47243	10.0664	9.14933	9.24224	9.78622	9.80906	9.99081	10.0115	9.63116	9.54279	-0.136062	-0.556393	0.378512	0.250962	-0.514573	0.189034
NP_005908	P40925	Malate dehydrogenase, cytoplasmic	9.64686	9.53971	9.05311	9.23003	9.96081	8.6081	9.60969	9.21396	9.31323	9.43107	9.48634	9.64692	-0.234465	-0.810966	-0.304006	0.641546	0.333424	0.485427
NP_005909	P40926	Malate dehydrogenase, mitochondrial precursor	8.98024	9.22244	9.16872	9.04977	8.89887	9.52784	8.96657	8.89786	9.04319	9.17899	9.14776	9.24455	-0.761213	-0.454032	-0.0740006	0.286881	0.464668	1.62761
NP_005947	P11586	C-1-tetrahydrofolate synthase, cytoplasmic	9.36175	9.16374	8.57296	9.00196	9.33089	9.04544	8.97376	8.84243	8.85988	8.94397	8.73209	8.41689	0.0976108	-0.152003	0.0703893	-0.473931	0.757023	0.0976108
NP_006001	P55145	ARMET protein precursor	11.4888	10.8068	11.3663	11.3827	11.0652	12.2313	10.1116	9.76283	11.1447	10.2579	11.0354	11.2534	0.163499	-0.268817	-0.415037	0.0285692	1.13093	0.669027
NP_006102	P42765	3-ketoacyl-CoA thiolase, mitochondrial	10.8003	10.0105	9.65106	10.5553	10.1456	9.87951	10.8288	10.4448	10.6804	10.8416	10.5214	10.6252	-0.200913	0.0285692	0.321928	-0.736966	-0.810966	0.495695
NP_006108	O75521	Peroxisomal 3,2-trans-enoyl-CoA isomerase	11.5099	11.3189	9.67435	12.1929	11.5494	10.202	12.1063	12.1163	12.0573	11.7541	11.7404	11.7381	-1.05889	0.0143553	0.495695	-0.971431	-0.621488	0.333424
NP_006187	O19048	Poly(rC)-binding protein 1	11.4027	11.2504	11.2945	10.9163	10.5274	11.6196	10.9553	10.8833	11.0513	11.2421	10.9732	11.465	0.238787	-0.268817	0	-0.514573	-0.321928	-0.120294
NP_006280	Q9Y490	Talin-1	8.84889	8.74427	9.13511	8.15562	7.98168	9.20889	7.62404	8.00245	8.13825	8.30264	7.99299	8.28395	0.275007	0.0143553	0.201634	-0.395929	0.176323	-0.494109
NP_006358	Q01518	Adenylyl cyclase-associated protein 1	10.591	10.4702	11.0968	10.7465	10.299	11.1628	10.7736	10.8153	10.7644	10.4785	10.6228	10.3341	-0.473931	-0.556393	-0.120294	0.545968	0.31034	0.356144
NP_006364	Q99536	Synaptic vesicle membrane protein VAT-1 homolog	10.5715	10.5785	10.4879	10.3832	10.3806	10.4057	9.90213	9.93624	9.82331	9.92197	9.89381	10.1886	-1.152	-0.136062	-0.184425	-0.286304	0.713696	-0.136062
NP_006588	Q71U34	Heat shock cognate 71 kDa protein	12.3706	12.0924	11.5235	12.5445	11.6324	11.8971	12.7988	12.6872	12.8807	12.5758	12.7335	13.1933	-0.514573	-0.217591	0.0426443	0.226509	-0.136062	0.238787
NP_006592	Q15185	Prostaglandin E synthase 3	9.44254	9.26874	9.65782	9.45659	8.55875	9.82167	9.42214	9.53242	9.13963	9.57514	9.02513	9.37423	-0.184425	0.0426443	1.27501	-0.473931	-0.643856	1.38957
NP_006614	O43175	D-3-phosphoglycerate dehydrogenase	12.0173	11.3308	9.64663	11.4681	10.9241	10.6561	11.0388	11.0177	10.7802	11.3677	10.8838	10.8455	0.298658	-0.494109	0.378512	0.15056	-0.785875	0.201634
NP_006648	O95954	Formimidoyltransferase-cyclodeaminase	10.0756	9.88966	10.0063	10.1178	10.6126	10.1361	12.0198	12.3553	12.1817	12.6132	12.1179	11.6686	1.58976	0.464668	0.632268	0.15056	-1	-0.152003
NP_006752	P62262	14-3-3 protein epsilon	10.1046	9.78281	10.1448	10.491	8.80186	10.3207	10.8464	10.6292	10.3358	10.4088	10.0525	10.2226	0.765535	1.77821	0.0703893	-0.761213	-0.286304	-0.217591
NP_008855	Q6PDM2	Splicing factor, arginine/serine-rich 1	8.66472	8.6297	8.63349	9.10321	8.75162	9.03412	8.98329	8.90595	8.55452	8.59078	8.42534	8.9864	0.910733	0.400538	0.925999	0.0285692	0.214125	0.111031
NP_009032	Q9UL12	Sarcosine dehydrogenase, mitochondrial precursor	8.65471	7.96539	7.64076	7.87923	7.6595	7.97118	8.27137	8.16742	8.23466	8.5279	7.83533	8.10502	-0.862496	-0.358454	0.298658	-1.05889	-1.18442	-0.286304
NP_009057	P55072	Transitional endoplasmic reticulum ATPase	10.8137	10.8524	10.555	10.6726	10.5374	11.1046	10.4287	10.3561	10.5248	10.5245	10.4672	10.7007	0.163499	-0.286304	-0.136062	0.238787	0.176323	-0.434403
NP_036226	P30044	Peroxiredoxin-5, mitochondrial precursor	11.7203	11.8514	11.3375	11.5084	11.8744	12.1742	11.697	11.6648	12.1051	12.0525	12.0664	11.8036	0.0426443	-0.415037	0.0703893	-0.286304	-0.268817	0.411426
NP_036322	O75891	10-formyltetrahydrofolate dehydrogenase	10.409	10.3029	9.41511	9.8231	10.1259	9.9062	9.18809	9.36724	9.11187	9.82622	9.47915	9.09387	0.378512	-0.862496	-0.535332	0.863938	0.731183	0.333424
NP_054752	P38892	Hypothetical 33.8 kDa protein in TWT1-FLO5 intergenic region	11.6908	11.756	10.6228	10.6734	11.6162	11.0554	11.7565	11.6646	11.5993	11.6617	11.4937	11.4891	1.32769	0.575312	1.12433	-0.599462	-0.234465	-0.358454
NP_055049	Q92506	Estradiol 17-beta-dehydrogenase 8	11.5894	11.3905	11.0867	11.6351	11.7178	11.9336	11.3836	11.2393	11.5323	11.6945	11.5555	11.5071	-0.736966	0.0285692	0.485427	-0.136062	-0.340075	0.344828
NP_056991	P28838	Cytosol aminopeptidase	12.7511	12.2919	11.8107	12.5025	12.2788	12.3801	11.7646	11.6744	11.7428	11.659	11.2622	10.737	-0.434403	-0.535332	-0.473931	1.4489	0.454176	1.90689
NP_057152	Q9Y3D6	Mitochondrial fission 1 protein	10.6422	10.4995	9.77079	10.2463	10.3524	10.6915	10.413	10.2556	10.4761	10.5654	10.6037	10.3223	-1.39593	-1.08927	-0.434403	0.0143553	0.111031	-0.713119
NP_057370	Q7Z4W1	L-xylulose reductase	13.2117	13.3924	12.5834	13.6186	13.5718	13.164	13.8787	13.9048	13.963	14.1635	14.0609	14.3958	3.14893	0.956057	0.163499	-0.434403	-0.888969	-0.577767
NP_060979	Q96AG4	Leucine-rich repeat-containing protein 59	7.92236	7.78052	7.75721	7.97284	7.74467	8.20479	7.88072	7.76345	7.98774	7.97558	8.14243	8.22123	-0.862496	0.0565835	-0.217591	-0.321928	-0.217591	0.555816
NP_066284	Q9BTZ2	Dehydrogenase/reductase SDR family member 4	11.1792	11.4649	9.93496	11.1346	10.8907	10.7938	9.48466	9.65822	9.70979	9.94571	9.90265	10.2657	-0.785875	-0.234465	0.918386	1.09761	1.14405	1.91456
NP_066299	Q5R844	Myosin light polypeptide 6	11.1495	10.917	11.2527	11.0587	11.3291	11.1006	10.9852	10.8871	11.1859	11.1778	11.1046	11.0934	-0.152003	0.722466	0.632268	-0.473931	-0.0892673	-0.395929
NP_066953	P62941	Peptidyl-prolyl cis-trans isomerase A	11.8668	12.0309	11.7867	12.2431	12.189	11.7972	11.9383	11.8993	12.0656	12.1538	12.0645	12.5075	-0.234465	-0.434403	-0.0439433	0.594549	0.963474	0.286881
NP_072090	P19059	2-hydroxymuconic semialdehyde dehydrogenase	11.8133	12.2422	12.5144	11.898	11.563	11.2359	12.3682	12.3502	12.5244	12.489	12.5339	12.4975	1.21412	-0.0439433	-0.556393	-0.915936	-1.25154	-0.599462
NP_079034	Q9BSE5	Agmatinase, mitochondrial precursor	9.62219	9.43718	9.04702	9.57701	9.4326	9.35135	9.08509	8.87239	8.93329	9.16432	8.58278	8.90494	0.124328	0.604071	0.641546	-0.514573	-0.888969	0.137504
NP_115679	P14802	Hypothetical oxidoreductase yoxD	9.1066	8.65124	7.48437	8.93351	7.526	8.23121	9.08464	8.88733	8.39598	8.74477	8.85802	8.58065	-0.184425	0.389567	0.495695	-0.514573	-0.184425	0.214125
NP_570602	P04217	Alpha-1B-glycoprotein precursor	14.235	14.1678	13.9954	14.1858	14.3217	14.312	13.9262	14.0306	14.1006	14.0127	14.0357	13.7511	0.378512	0.137504	-0.0588937	0.659925	0.111031	0.378512
XP_371848	Q9P1F3	Protein C6orf115	9.0504	9.01926	9.31608	8.11016	8.49783	8.81445	9.21286	8.80783	9.49595	9.63856	8.92874	7.02539	0.400538	-0.473931	-0.217591	1.19535	0.782409	-0.713119
* mRNA expression levels were calculated using robust multi-array average (RMA) function incorporated in the Bioconductor "affy" package (http://www.bioconductor.org/)
** Protein expression levels were calculated as a base-two logarithm transformed ratio of the common reference expression level to the expression level of the sample
