# Supplementary material for: Comparison of Protein and mRNA Expression Evolution in Humans and Chimpanzees
Source: PLoS One. 2007 Feb 14;2(2):e216. doi: 10.1371/journal.pone.0000216 (PMC1789144; doi:10.1371/journal.pone.0000216)
Supplement: Table S4 — mRNA and protein expression levels for 159 proteins detected in the second set of experimental replicates (0.09 MB XLS) [file pone.0000216.s008.xls]

## Sheet: data.set.2
Table S4. mRNA and protein expression levels for 159 proteins detected in the second set of experimental replicates
RefSeq. ID	UniProt SwissProt	Protein Name	mRNA expression levels*												Protein expression levels**
			C1	C2	C3	C4	C5	C6	H1	H2	H3	H4	H5	H6	c1	c2	c3	h1	h2	h3
NP_000005	P01023	Alpha-2-macroglobulin precursor	8.57345	8.45938	8.68941	8.35913	8.48177	8.4456	8.40986	8.59392	8.46562	8.07999	8.22759	8.41817	0.238787	1.07039	-0.0588937	-1.4344	-0.415037	-0.0740006
NP_000010	P24752	Acetyl-CoA acetyltransferase, mitochondrial precursor	8.32595	8.19273	8.10708	8.48156	7.99014	8.24859	8.78216	8.59592	8.48299	8.52647	8.34797	8.38534	-0.340075	-0.514573	-0.321928	0.669027	0.632268	-0.514573
NP_000021	P21549	Serine--pyruvate aminotransferase	9.67506	9.04974	8.92981	9.06493	8.82446	9.03599	12.3202	11.7557	11.9576	11.6841	11.6508	11.2071	-0.37707	-0.736966	-1.08927	1.20789	1.1635	0.263034
NP_000022	P13716	Delta-aminolevulinic acid dehydratase	11.0976	10.8013	10.6606	11.2355	10.0974	10.3009	11.0472	10.8652	10.6373	11.3426	10.4974	10.5018	0.641546	0.422233	0.137504	-0.810966	1.0072	0.0840643
NP_000026	P05062	Fructose-bisphosphate aldolase B	10.5731	10.9991	10.5498	10.4567	10.6259	10.7929	10.857	10.9479	11.1074	11.0051	10.9713	10.9441	0.201634	-0.0439433	-0.136062	-0.251539	0.678072	-0.0439433
NP_000033	P02749	Beta-2-glycoprotein 1 precursor	12.1317	12.0754	11.9171	12.3207	12.0558	11.7605	11.998	12.2591	12.2286	12.0963	12.1563	12.1034	0.575312	0.189034	-0.152003	0.356144	0.0565835	0.263034
NP_000036	P05089	Arginase-1	9.06563	8.95367	9.1041	8.15853	8.06645	8.49927	8.7182	8.45173	8.76653	8.88498	8.44688	8.41176	1.53605	0	-0.304006	0.226509	0.400538	0.298658
NP_000087	P00450	Ceruloplasmin precursor	11.2429	11.7505	12.5355	11.9968	11.4295	11.8906	11.7663	11.823	11.5438	10.9563	11.3635	10.0466	0.948601	0.0565835	0.0840643	-0.943416	-1.8365	-0.643856
NP_000099	P09622	Dihydrolipoyl dehydrogenase, mitochondrial precursor	8.54241	8.56871	8.12008	8.68899	8.35577	8.39725	9.02559	8.90076	8.4028	8.51864	8.61009	8.64504	0.687061	-0.184425	-0.120294	0.298658	0.0840643	-0.415037
NP_000117	P13804	Electron transfer flavoprotein subunit alpha, mitochondrial precursor	13.1009	12.7894	12.5646	12.9287	12.1223	12.9059	12.4996	12.2452	12.3312	12.6682	12.0813	12.2008	1.11103	1.18269	0.505891	0.815575	0.411426	1.63691
NP_000129	P35555	Fibrillin-1 precursor	8.78689	7.57044	7.4018	7.75589	7.40997	8.55383	7.89216	8.37853	8.18392	7.59134	8.04661	7.65234	0.879706	-0.666576	-0.494109	0.545968	0.31034	0.389567
NP_000173	P40939	Trifunctional enzyme subunit alpha, mitochondrial precursor	12.5201	11.4696	11.1031	11.1447	11.031	10.9929	11.6873	11.5605	11.7042	12.1007	11.7618	11.4738	-0.268817	-0.268817	1.16993	1.22651	0.970854	1.02148
NP_000182	P35914	Hydroxymethylglutaryl-CoA lyase, mitochondrial precursor	11.9228	12.1782	11.6026	11.687	11.1139	11.9028	12.2286	12.1164	12.2422	12.3367	12.3672	12.1643	0.62293	-0.943416	0.422233	0.782409	0.526069	-0.136062
NP_000282	P00558	Phosphoglycerate kinase 1	9.76579	9.46622	9.64102	9.42041	8.50086	8.98481	9.79139	9.66916	9.86863	9.9131	9.51803	9.75455	-0.0892673	0.485427	0.411426	-2.18442	-0.68966	-0.0740006
NP_000356	P60175	Triosephosphate isomerase	11.7379	11.665	12.6474	11.9543	11.8959	11.8538	11.8432	11.6648	12.0164	12.1082	12.3189	12.2396	0.604071	0.669027	0.411426	0.757023	0.650765	-0.0291463
NP_000405	P51659	Peroxisomal multifunctional enzyme type 2	12.2419	11.9643	12.1711	12.5767	11.4654	12.212	12.2359	11.8923	11.4498	11.9098	11.5226	11.5657	0.111031	0.378512	-0.599462	0.704872	-0.577767	-0.514573
NP_000420	Q00266	S-adenosylmethionine synthetase isoform type-1	13.9483	13.4221	13.5421	13.1574	13.3608	13.49	13.4964	13.2006	13.1489	13.4307	13.2126	12.3612	0.124328	0.201634	-0.599462	0.782409	0.0143553	-0.971431
NP_000437	P27169	Serum paraoxonase/arylesterase 1	10.4846	10.6277	9.46566	10.8622	9.80316	9.77141	11.362	11.4593	11.1793	11.0416	10.9636	11.0677	0.238787	0.189034	-0.120294	0.565597	1.1375	-0.415037
NP_000445	P60052	Superoxide dismutase [Cu-Zn]	14.1475	14.1826	13.8498	14.1312	13.6933	13.9118	14.1923	14.176	14.0853	14.1444	14.1155	14.1037	0.201634	0.713696	0.367371	-1.12029	-0.152003	-0.358454
NP_000468	P02768	Serum albumin precursor	12.3782	12.6691	11.9802	12.4822	12.8028	11.9779	12.2452	12.5001	12.8323	12.8793	13.0094	12.436	0.226509	0.411426	0.485427	-0.577767	-0.473931	0.176323
NP_000498	P09467	Fructose-1,6-bisphosphatase 1	14.0772	12.9148	12.8096	12.2359	12.7711	13.5473	13.4037	13.168	13.2551	13.3632	13.3996	12.5211	-0.494109	0.505891	-1.08927	0.400538	0.111031	1.79909
NP_000499	P02671	Fibrinogen alpha chain precursor	12.0084	12.7672	12.7644	12.6942	12.7426	12.383	12.6142	12.443	12.5715	12.2951	12.6875	11.5358	-0.473931	-4.05889	0.495695	1.05658	0.782409	0.0840643
NP_000500	P02679	Fibrinogen gamma chain precursor	14.2862	14.4671	14.4715	14.5852	14.2337	14.3607	14.5612	14.4933	14.4658	14.2399	14.3771	14.0646	1.09085	0.0565835	0.485427	-0.454032	2.90497	0
NP_000509	P68873	Hemoglobin subunit beta	12.1808	13.0572	11.4502	11.8536	10.7425	13.2345	11.5988	10.5342	12.5519	13.5162	12.9494	12.112	-1.47393	0	-0.234465	-0.915936	-0.395929	1.07724
NP_000574	P02774	Vitamin D-binding protein precursor	14.1146	14.0224	14.1116	14.1888	13.8887	13.8583	14.1565	14.2527	14.1393	14.1096	14.0763	14.0257	0.731183	0.526069	0.411426	-0.643856	-0.0144996	-0.217591
NP_000583	P0C0L5	Complement C4-B precursor	14.0043	13.9259	14.1046	14.0944	14.3353	14.3777	14.0062	13.7577	14.0642	13.8272	14.182	13.4009	0.15056	0.594549	0.62293	-0.415037	2.66448	0.0840643
NP_000654	P80404	4-aminobutyrate aminotransferase, mitochondrial precursor	10.361	10.1901	9.81029	9.62719	9.72324	9.42561	11.6024	11.2911	11.469	11.5665	11.1991	11.2727	-0.152003	-2	0	0.678072	-0.473931	0.176323
NP_000658	P07327	Alcohol dehydrogenase 1A	12.4164	13.0504	8.72624	13.4524	13.005	11.7653	13.069	13.0476	12.7441	13.0552	12.9791	12.3024	0.226509	0.632268	0.367371	-1.02915	0.189034	0.0285692
NP_000659	P00325	Alcohol dehydrogenase 1B	11.7744	12.3582	10.419	11.8956	12.0677	11.4776	11.5316	11.5144	11.1393	11.4567	11.2336	10.9786	0.722466	1.0072	0.400538	-1.39593	-0.621488	-1.02915
NP_000661	P08319	Alcohol dehydrogenase 4	8.27627	8.60205	6.16193	9.78708	9.23964	7.95143	10.5015	10.4172	10.3896	10.1297	10.3041	10.1992	-0.666576	0.0565835	-0.915936	0.0565835	1.05658	0.176323
NP_000680	P00352	Retinal dehydrogenase 1	12.7948	13.101	10.6322	13.6219	12.9079	10.9733	13.2777	13.2669	12.4957	12.7838	12.1987	12.5952	0.422233	1.28096	0.748461	-1.25154	-0.514573	-0.643856
NP_000681	P05091	Aldehyde dehydrogenase, mitochondrial precursor	13.6544	13.6366	13.3389	13.6864	13.5484	13.6572	13.6484	13.6047	13.707	14.0102	13.7562	13.7952	0.910733	0.298658	0.0840643	0.15056	0.201634	-0.514573
NP_000706	P04003	C4b-binding protein alpha chain precursor	13.5923	13.7329	13.0254	13.7632	13.8884	13.2903	14.1677	13.7996	14.0066	13.3804	13.8304	13.6272	0.704872	0.83996	0.321928	0.782409	-0.494109	-0.599462
NP_000761	P10632	Cytochrome P450 2C8	10.5651	10.3798	8.57318	10.7851	10.2181	9.35029	10.948	10.9533	10.9412	10.8446	10.5872	10.7586	0.344828	0.298658	-0.0588937	0.15056	0.0976108	-0.286304
NP_000764	P05181	Cytochrome P450 2E1	14.3573	14.0402	14.1809	14.0419	13.1696	14.3057	14.4005	14.3819	14.302	14.3801	14.2738	14.3775	0.485427	-0.395929	-1	0.0703893	0.189034	0.0976108
NP_000884	P01042	Kininogen-1 precursor	13.6796	13.8388	13.1018	13.8731	13.8992	13.4581	14.13	14.1944	14.0902	13.8981	14.0751	14.0961	0.389567	0.0143553	0.238787	0.823749	0.214125	-1.35845
NP_000911	P11498	Pyruvate carboxylase, mitochondrial precursor	11.5999	11.6906	11.3156	11.0439	11.5567	11.7939	11.0508	10.5967	10.9876	10.7294	11.2287	10.22	-0.152003	0.411426	-0.120294	0.0285692	-0.68966	-0.535332
NP_000933	P23284	Peptidyl-prolyl cis-trans isomerase B precursor	12.5523	12.4699	12.6671	12.3959	12.7172	13.3302	11.7563	11.8711	12.4526	12.251	12.5672	12.386	0.687061	-0.200913	0.275007	-0.621488	0.356144	-0.104697
NP_000959	P36578	60S ribosomal protein L4	7.87301	8.52279	8.23063	7.6375	7.67923	8.08124	8.10626	8.16132	8.19253	8.32785	8.35289	8.60535	-0.454032	-1.55639	-0.184425	-1.2863	1.07039	-0.340075
NP_000969	P62832	60S ribosomal protein L23	12.9981	12.8789	12.3484	13.1047	13.0091	12.5518	13.2346	13.3837	13.2609	12.9408	13.2449	13.3724	1.41143	0.0285692	0.238787	0.565597	0	-0.666576
NP_000980	P62890	60S ribosomal protein L30	8.95642	8.84495	8.60821	9.08305	8.82218	8.87299	9.30327	9.30361	9.28924	9.12609	9.23882	9.20818	1.02148	-3.8365	-0.251539	0.799087	0.650765	0.275007
NP_000993	P05388	60S acidic ribosomal protein P0	13.4471	13.5735	13.4503	13.3776	13.6127	14.1165	13.4861	13.6012	13.4957	13.6118	13.5444	13.8799	0.978196	0.0840643	-0.321928	0.62293	0.495695	1.23266
NP_000994	P05386	60S acidic ribosomal protein P1	13.9393	14.087	13.9219	13.6853	14.0342	14.1792	13.5942	13.7325	13.7806	13.8421	13.8718	13.9906	0.669027	-0.0740006	-0.321928	0.0703893	0.250962	-0.184425
NP_000998	P62703	40S ribosomal protein S4, X isoform	12.9306	12.7384	12.3853	13.5325	13.4081	12.9795	13.2034	13.6622	13.6392	12.9015	13.3252	13.3259	0.464668	0.378512	0.495695	1.95233	0.765535	0.83996
NP_001003	P62243	40S ribosomal protein S8	8.32294	8.25695	8.14668	8.14341	8.14698	8.2813	8.32649	8.37463	8.2388	8.19521	8.22872	8.2408	1.59455	-0.514573	-0.0892673	3.28244	0.879706	0.722466
NP_001012	P08708	40S ribosomal protein S17	7.99378	7.99263	7.87415	7.92879	8.05503	8.0821	8.03473	8.05582	8.01877	7.94807	8.068	8.10795	-0.120294	-0.168123	0.604071	0.443607	0.356144	1.60881
NP_001015	P63221	40S ribosomal protein S21	8.47306	8.55922	8.64603	8.48175	8.3641	8.53616	8.63464	8.66138	8.72157	8.74323	8.59026	8.63212	0.250962	0.0703893	-0.0892673	-0.0892673	0.505891	-0.184425
NP_001054	P02787	Serotransferrin precursor	11.1784	11.3124	11.2541	11.111	10.9894	10.625	12.2015	12.0521	12.5599	12.6891	12.2794	12.1194	-0.234465	-0.514573	0.238787	0.124328	0.678072	0
NP_001071	P51649	Succinate semialdehyde dehydrogenase, mitochondrial precursor	9.57612	9.42654	8.32031	9.65524	9.3492	9.22466	10.6066	10.6748	10.5426	10.7268	10.4715	10.129	0.847997	0.0703893	0.263034	0.948601	0.879706	0.545968
NP_001076	P01011	Alpha-1-antichymotrypsin precursor	14.3967	14.8621	14.855	14.5397	14.7844	14.7361	14.3127	14.1048	14.4664	14.0024	14.3368	14.0036	1.41684	0.238787	0.584963	-2.05889	-0.915936	-1.8365
NP_001092	P60707	Actin, cytoplasmic 1	13.4561	13.2751	13.8953	13.2407	13.4672	13.9631	13.1933	13.1493	13.1532	13.5312	13.2404	13.2437	0.400538	0	-0.454032	0	-0.0144996	-0.136062
NP_001143	P05141	ADP/ATP translocase 2	7.5143	7.40771	6.77977	7.38589	7.40613	6.97435	7.18007	7.26268	6.91205	7.11943	7.08089	7.14449	1.82782	0.333424	-0.494109	-0.321928	0.189034	0.286881
NP_001144	P09525	Annexin A4	10.8742	11.4625	10.8355	11.6111	10.3718	11.773	10.8722	10.7633	10.4298	10.9294	10.7178	10.4596	0.831877	-0.0291463	-1.32193	-0.494109	-1.51457	-0.136062
NP_001150	Q06278	Aldehyde oxidase	13.5675	13.6768	12.9482	13.6301	13.4442	12.8003	13.5842	12.9636	12.79	13.3367	13.0238	12.6294	0.545968	0.584963	0.286881	-0.713119	-0.599462	0.263034
NP_001173	P49419	Aldehyde dehydrogenase family 7 member A1	9.6898	9.02696	8.21696	9.30263	8.84345	8.50623	9.52197	9.55645	9.76684	9.86567	9.31256	9.39011	0.263034	0.163499	0.0143553	0.545968	0.454176	-0.37707
NP_001350	Q16698	2,4-dienoyl-CoA reductase, mitochondrial precursor	9.26198	9.46768	8.9046	9.47794	9.16973	8.87062	9.63896	9.66962	9.295	9.62528	9.2001	9.48542	0.831877	0.0285692	-0.0892673	0.298658	0.443607	-0.358454
NP_001419	P06733	Alpha-enolase	10.0305	9.95119	11.2832	9.92392	9.82671	10.4887	9.6391	9.57252	9.52363	10.0177	9.78336	10.0289	-0.736966	0.722466	-0.0892673	-0.184425	0.505891	-0.643856
NP_001452	P49326	Dimethylaniline monooxygenase [N-oxide-forming] 5	10.0353	10.9439	8.17202	10.7085	9.99375	9.60538	11.3659	11.3985	10.8614	10.7985	10.3654	10.8336	0.555816	0.189034	0.275007	-0.0892673	0.722466	-0.321928
NP_001473	P50440	Glycine amidinotransferase, mitochondrial precursor	10.7751	10.866	10.7616	11.1698	10.1314	10.8246	11.8088	11.6371	11.6951	11.8845	11.7398	11.5936	0.214125	-0.184425	-0.434403	0	0.695994	0.400538
NP_001598	P09110	3-ketoacyl-CoA thiolase, peroxisomal precursor	13.0339	12.1581	11.3268	12.33	12.3348	12.2105	12.7614	12.6566	12.5943	12.9711	12.6614	12.4213	0.632268	0.214125	-0.37707	0.722466	0.321928	0.0143553
NP_001600	P45954	Short/branched chain specific acyl-CoA dehydrogenase, mitochondrial precursor	10.6442	10.6822	9.36084	10.4366	8.44759	10.3314	11.6813	11.6606	10.8365	11.2022	11.0881	10.8686	1.14405	0.604071	0.344828	-1.59946	-0.943416	-0.713119
NP_001613	P02765	Alpha-2-HS-glycoprotein precursor	13.6756	12.8951	12.802	13.8323	13.5082	13.0533	13.9587	14.0779	14.1804	14.1323	14.0319	13.9827	0.411426	-1.08927	-0.152003	3.02503	0.731183	-0.286304
NP_001624	P02760	AMBP protein precursor	14.5824	14.4329	14.2272	14.4957	14.588	14.4366	14.4798	14.5461	14.5298	14.5367	14.5559	14.5152	1.42761	0.464668	-0.0740006	-0.621488	1.8679	0.536053
NP_001688	P48047	ATP synthase O subunit, mitochondrial precursor	10.8695	10.951	9.97357	11.3953	10.8049	10.388	11.2675	11.2829	11.1241	11.007	11.139	11.3832	0.333424	0.321928	-0.37707	0.545968	0.226509	0.536053
NP_001704	Q93088	Betaine--homocysteine S-methyltransferase	13.7914	13.7352	13.8906	13.7274	13.2696	13.7824	13.3445	13.2199	13.1426	13.3819	13.2179	12.6516	0.356144	1.11103	0.545968	-0.152003	0.15056	0.422233
NP_001743	P04040	Catalase	10.9828	10.8242	9.73494	10.6834	10.3235	10.1159	10.7203	10.6438	10.4345	11.0196	10.4242	10.6429	0.594549	0.411426	-0.184425	0.321928	0.189034	-0.268817
NP_001809	P17516	Aldo-keto reductase family 1 member C4	13.1416	13.0941	11.0367	12.9551	11.5775	11.8695	13.1346	12.7833	12.5219	13.1032	12.8087	12.44	-5.64386	-6.64386	-0.0291463	0.871844	1.14405	0.871844
NP_001822	P10909	Clusterin precursor	10.7057	11.024	11.0967	11.205	11.1254	11.1312	10.672	10.6781	10.818	10.7608	10.805	10.529	-4.32193	-2.94342	-0.943416	0.31034	0.485427	-0.736966
NP_001866	P31327	Carbamoyl-phosphate synthase [ammonia], mitochondrial precursor	13.5135	13.1294	12.7601	12.795	11.6068	12.12	13.3122	13.3534	12.9699	13.1282	12.714	12.8613	0.62293	0.275007	0.298658	-0.286304	0.356144	-0.152003
NP_001899	P07858	Cathepsin B precursor	11.6515	12.3411	12.3845	10.207	10.1808	10.554	12.4164	12.4599	12.4448	12.1476	12.1347	11.6705	0.669027	0.650765	-0.577767	0.137504	-0.0740006	-0.514573
NP_001952	Q5R8Z3	Elongation factor 2	13.1958	13.2453	13.1932	12.9087	13.3927	13.5018	13.3633	13.4013	13.2381	13.2562	13.4356	13.5556	0.367371	0.286881	-0.577767	0.214125	0.356144	0.263034
NP_001957	Q08426	Peroxisomal bifunctional enzyme	11.9225	11.2677	9.74241	12.0162	10.9901	11.1448	12	11.9526	11.4052	11.8147	11.6109	11.5854	0.321928	-0.0892673	-0.713119	1.14405	-0.184425	0.111031
NP_001986	P33121	Long-chain-fatty-acid--CoA ligase 1	12.9008	12.0796	12.9768	12.8841	12.411	13.4764	13.1177	12.8845	12.9868	13.1119	12.4876	13.0575	-0.0588937	-0.200913	-1.18442	0.632268	0.695994	0.176323
NP_002017	P02751	Fibronectin precursor	11.0597	10.9046	10.5394	10.7847	11.2375	10.3629	11.3619	11.0105	10.8465	11.0121	11.1869	10.9268	-0.577767	-0.217591	-0.454032	0.298658	0.15056	0.0565835
NP_002037	P04406	Glyceraldehyde-3-phosphate dehydrogenase	13.4059	13.7282	14.1813	13.1974	12.793	13.9023	13.4029	13.0499	13.2604	13.3976	13.1325	13.5944	0.505891	-0.0291463	-0.184425	-0.599462	0.15056	0.0143553
NP_002055	P35754	Glutaredoxin-1	10.2449	11.1363	10.4513	11.0802	10.9728	10.3551	10.8821	10.7131	11.3049	10.5681	10.5787	10.8037	-0.621488	0.485427	0.189034	-1.4344	-1.12029	-0.556393
NP_002071	P00505	Aspartate aminotransferase, mitochondrial precursor	13.3033	13.0515	12.8321	12.9426	12.9809	12.6158	12.8215	12.7316	12.6008	13.0203	12.8969	13.4485	0.659925	1.10434	0.565597	-0.395929	0.823749	0.378512
NP_002098	P84248	Histone H3.3	12.9374	12.9605	12.9071	12.8352	12.7559	12.8715	12.7585	12.8112	12.9928	12.9517	12.9883	12.7323	0.137504	-0.0892673	0.189034	0.163499	0.189034	0.594549
NP_002147	P10809	60 kDa heat shock protein, mitochondrial precursor	9.9471	9.99335	10.8086	10.02	10.534	10.7547	10.6327	10.2373	9.74588	10.2849	9.57021	10.7403	0.773996	0.137504	0.0565835	0.163499	-0.0291463	-0.577767
NP_002159	P48735	Isocitrate dehydrogenase [NADP], mitochondrial precursor	10.3191	11.7123	11.5295	11.31	11.9667	11.483	10.9535	10.1855	11.0161	10.5148	11.5314	10.6205	0.378512	0.189034	0.0285692	0.0703893	0.443607	-0.535332
NP_002558	P30086	Phosphatidylethanolamine-binding protein 1	13.0582	13.1617	11.9428	12.8363	13.5908	12.6619	13.2915	13.3544	13.2402	13.3109	13.5764	13.4041	0.704872	0.176323	0.400538	0.0285692	0.189034	-0.136062
NP_002626	Q00325	Phosphate carrier protein, mitochondrial precursor	12.5663	12.157	12.6479	12.4668	11.864	12.7756	12.7975	12.7365	12.7725	12.8992	12.69	13.1602	1.18903	0.400538	-0.761213	0.62293	0.495695	0.485427
NP_002769	P07602	Proactivator polypeptide precursor	12.5044	12.0467	12.7747	11.5559	11.6475	12.5436	12.0991	12.1624	12.3095	12.3613	12.0273	11.8737	0.713696	0.443607	0.0703893	0.286881	-0.599462	-0.0892673
NP_002810	Q29099	Polypyrimidine tract-binding protein 1	10.1612	9.72011	10.1904	9.92239	10.1833	10.5533	9.7705	9.68837	10.0062	10.016	9.78117	10.3378	1.02148	0.378512	-0.321928	0.356144	-0.286304	0.124328
NP_002854	P06737	Glycogen phosphorylase, liver form	8.76718	8.85572	8.92873	8.88183	8.93485	8.56068	8.2079	8.04509	8.10113	8.53304	8.49793	9.24291	0.422233	1.34483	0.389567	-0.434403	-0.286304	-1.32193
NP_002930	P13489	Ribonuclease inhibitor	9.35206	9.11881	9.27778	9.09086	9.18206	9.61785	9.03328	9.00202	9.20202	9.20297	9.27212	9.1258	-0.862496	0.613532	3.92125	0.575312	1.80323	0.575312
NP_002955	P05109	Protein S100-A8	7.41907	8.14452	11.785	7.29831	7.44903	10.259	9.30052	7.45528	10.905	9.7035	10.4556	7.50804	-0.268817	0.516015	0.713696	-0.577767	-0.535332	2.09424
NP_002991	P21912	Succinate dehydrogenase [ubiquinone] iron-sulfur protein, mitochondrial precursor	11.213	11.1819	10.7422	11.1593	11.0648	10.9454	10.2325	9.98872	10.6586	10.8446	10.3517	10.6391	0.516015	0.111031	-0.395929	0.790772	0.137504	0.0840643
NP_003095	Q00796	Sorbitol dehydrogenase	12.0523	11.8931	12.5898	11.8625	11.6135	12.2556	12.3801	12.1426	11.898	12.5753	11.9835	12.4957	0.475085	0.238787	-0.152003	0.0976108	-0.120294	-0.304006
NP_003118	Q13813	Spectrin alpha chain, brain	9.86665	9.88319	9.72445	8.92476	9.76576	10.004	8.89505	8.97143	8.93066	9.08139	9.64425	9.50876	0.176323	0.0143553	-0.556393	0.815575	0.545968	0.286881
NP_003119	Q01082	Spectrin beta chain, brain 1	8.57848	8.80826	8.66672	8.51564	8.85072	8.90181	8.51935	8.56589	8.55831	8.69529	8.79478	8.80985	0.0143553	-0.37707	-0.514573	-0.0439433	0.137504	0.189034
NP_003312	P49411	Elongation factor Tu, mitochondrial precursor	12.3539	12.4473	11.9843	12.1339	12.7808	12.3554	11.5819	11.498	11.9764	11.8891	12.0943	11.9775	0.378512	0.641546	0.137504	0.632268	0.464668	0.163499
NP_003357	P22695	Ubiquinol-cytochrome-c reductase complex core protein 2, mitochondrial precursor	9.25866	8.95066	8.9667	8.90068	8.69672	8.42878	9.08404	8.88327	9.03635	9.23117	8.88884	9.01445	-0.104697	-1.18442	-0.473931	1.07039	0.545968	0.516015
NP_003365	P21796	Voltage-dependent anion-selective channel protein 1	10.0216	10.3153	10.5578	10.1755	9.64245	10.7196	10.9842	10.7784	10.5962	10.9069	10.8403	10.9264	0.31034	1.18903	-0.104697	-0.304006	-0.599462	-0.251539
NP_003371	P08670	Vimentin	12.5048	11.587	12.1903	10.68	10.6896	12.1332	11.2587	11.6835	11.7388	11.2278	11.6251	10.3635	0.432959	-0.340075	-0.577767	-0.494109	-0.251539	1.55582
NP_003670	O15229	Kynurenine 3-monooxygenase	9.4978	9.91577	9.03879	10.0975	8.07338	8.79894	10.6163	10.3003	9.94635	9.84684	9.7265	9.57293	-2.12029	-1.39593	-1.68966	0.963474	0.669027	0.333424
NP_003739	P30038	Delta-1-pyrroline-5-carboxylate dehydrogenase, mitochondrial precursor	10.7674	10.9174	11.413	10.5405	9.85368	11.5058	11.0481	10.7592	11.1509	11.2499	10.7986	11.1355	0.555816	-0.200913	0.201634	-0.340075	-0.234465	-0.68966
NP_003840	P53597	Succinyl-CoA ligase [GDP-forming] subunit alpha, mitochondrial precursor	11.9708	12.0577	12.1717	12.2492	11.6496	12.1679	12.2553	12.1959	12.2052	12.2061	12.0964	12.4723	0.555816	-0.454032	-0.104697	-0.217591	0.545968	0.0285692
NP_004042	Q02338	D-beta-hydroxybutyrate dehydrogenase, mitochondrial precursor	8.95951	8.60014	8.63622	8.63829	8.36561	8.79752	8.7338	8.66916	8.93374	9.23289	9.08256	8.91703	0.765535	0.0840643	-0.713119	0.0285692	0.831877	-0.0740006
NP_004075	P59665	Neutrophil defensin 1 precursor	6.83821	7.1136	8.49512	6.55681	6.49797	6.61366	7.01308	6.6132	10.5969	7.66138	7.47777	6.89405	-0.473931	0.722466	0.15056	-1.18442	-0.599462	1.88753
NP_004083	P30084	Enoyl-CoA hydratase, mitochondrial precursor	13.5847	13.879	13.5969	13.5454	13.6346	13.7447	13.3917	13.3285	13.4536	13.6731	13.5003	13.7777	0.659925	0.659925	0.505891	-0.200913	-0.0439433	-0.454032
NP_004095	P49327	Fatty acid synthase	9.04721	9.99019	8.3739	11.0545	10.045	10.9045	9.29865	10.4141	10.2707	10.2547	11.9016	13.2208	-0.836501	-0.454032	-0.736966	1.48543	1.31034	1.76553
NP_004125	P38646	Stress-70 protein, mitochondrial precursor	8.3481	8.29054	8.28549	8.58889	8.21423	8.76077	9.15977	9.05355	8.78708	8.99838	8.8035	9.09594	1.07039	0.356144	-0.268817	0.298658	0.0976108	-0.621488
NP_004159	P31040	Succinate dehydrogenase [ubiquinone] flavoprotein subunit, mitochondrial precursor	11.4766	11.2786	11.352	11.277	10.9927	11.6394	11.0428	11.0489	11.2709	11.4037	11.2565	11.2362	0.831877	0.475085	-0.358454	0.659925	0.15056	0.333424
NP_004160	P34896	Serine hydroxymethyltransferase, cytosolic	9.72236	9.71776	9.71544	9.48044	9.61174	9.76384	9.24872	9.05934	9.32926	9.41243	9.21942	9.46053	0.31034	0.757023	0.321928	-0.736966	0.0143553	-0.217591
NP_004360	P12111	Collagen alpha-3(VI) chain precursor	11.2335	9.06343	8.99521	9.81747	9.98994	9.80547	9.22566	9.40972	9.34759	9.04256	9.53559	9.30973	0.879706	0.432959	-0.599462	1.31034	0.9855	0.411426
NP_004484	Q99714	3-hydroxyacyl-CoA dehydrogenase type-2	12.6211	12.3364	11.5138	12.2644	12.3138	12.6546	11.8521	11.6027	12.0684	12.26	11.9181	12.1563	0.823749	0.411426	0.0976108	-0.434403	0.422233	0.0426443
NP_004507	Q12906	Interleukin enhancer-binding factor 3	9.16331	8.77627	8.68055	8.48893	9.04124	9.21907	8.66052	8.72776	8.86735	8.86021	9.06322	9.04278	0.799087	-0.304006	-0.666576	1.36737	0.400538	-0.321928
NP_004578	Q9P2E9	Ribosome-binding protein 1	9.84119	9.87661	9.99733	9.88742	10.4356	10.2951	9.69125	9.76167	10.209	9.74419	10.3213	10.253	0.432959	0.505891	0.0285692	-0.514573	-0.514573	0.176323
NP_004604	P21980	Protein-glutamine gamma-glutamyltransferase 2	8.63606	9.76799	10.9419	8.60141	8.32098	10.3141	8.44318	8.03952	8.5948	8.3237	7.95459	10.0293	0.695994	-0.358454	0.250962	0.298658	0.516015	0.201634
NP_004896	P30041	Peroxiredoxin-6	10.5233	10.6382	9.90714	10.459	11.1772	10.4671	10.7565	10.5177	10.7709	10.9917	9.81747	9.88712	0.782409	1.1635	0.378512	-1.12029	-0.434403	-0.736966
NP_004915	O43707	Alpha-actinin-4	10.033	9.74322	10.1524	10.2146	10.1581	10.1657	9.88001	9.8934	10.1146	10.1394	10.346	11.1478	0.31034	0.956057	1.02148	1.31034	1.4489	0.910733
NP_005132	P02675	Fibrinogen beta chain precursor	14.3279	14.4603	14.4752	14.4442	14.3227	14.4591	14.4174	14.342	14.3197	14.1858	14.2444	13.8838	0.963474	-0.0439433	0.124328	-0.713119	-0.454032	0.0426443
NP_005134	P00738	Haptoglobin precursor	14.6144	14.7217	14.6174	14.6308	14.7102	14.6193	14.6159	14.479	14.5895	14.5383	14.6349	14.4521	0.713696	0.344828	0.0703893	0.356144	-0.535332	0
NP_005262	P00367	Glutamate dehydrogenase 1, mitochondrial precursor	12.0422	12.4896	12.3929	13.0404	11.841	12.3526	12.7765	12.8293	12.5771	12.8355	12.3418	13.0641	0.948601	0.565597	0.344828	-0.152003	0.31034	-0.915936
NP_005264	P54313	Guanine nucleotide-binding protein G(I)/G(S)/G(T) subunit beta 2	11.2998	11.1411	11.7585	10.6781	11.1827	11.693	11.0618	11.0424	11.2027	11.1304	11.1984	11.2403	-3.32193	-1.47393	-0.810966	0.0143553	-1.88897	0.0426443
NP_005304	P30101	Protein disulfide-isomerase A3 precursor	10.2887	10.3027	10.6021	10.5553	10.22	10.9443	10.6891	10.5369	10.5434	10.4821	10.3058	10.5879	0.485427	-0.251539	-0.286304	0.163499	0.659925	0.137504
NP_005509	P54868	Hydroxymethylglutaryl-CoA synthase, mitochondrial precursor	13.2183	12.6165	11.8878	11.914	11.2484	11.3002	12.1449	11.9851	12.0473	12.2589	12.0104	11.7475	0.275007	-0.599462	-0.0439433	0.400538	1.11103	0.659925
NP_005520	P98160	Basement membrane-specific heparan sulfate proteoglycan core protein precursor	9.24897	8.84061	8.9544	8.57925	8.86972	8.86406	8.63215	8.72789	9.22369	8.86972	9.27593	8.85573	0.687061	-0.0588937	-0.713119	-0.0439433	0.15056	0.432959
NP_005580	Q02252	Methylmalonate-semialdehyde dehydrogenase [acylating], mitochondrial precursor	11.5791	11.5431	11.3217	10.7467	10.7563	10.6348	11.4352	11.3489	11.319	11.4203	11.1364	11.059	0.411426	0.831877	0.31034	-0.915936	0.0840643	-1
NP_005712	Q5R8R1	Actin-like protein 3	9.26388	9.1959	9.77336	9.99511	8.57087	9.74415	9.31026	9.54929	8.97994	8.92436	8.75222	8.91374	1.37851	0.443607	-0.104697	-0.556393	0.0285692	1.7866
NP_005827	P52758	Ribonuclease UK114	10.5906	10.9676	10.2584	10.7855	9.98058	9.84955	11.336	11.2767	11.2561	11.2398	10.6846	11.2379	0.333424	0.555816	0.632268	-0.37707	0.214125	-0.473931
NP_005887	O75874	Isocitrate dehydrogenase [NADP] cytoplasmic	10.3327	9.66398	8.47243	10.0664	9.14933	9.24224	9.78622	9.80906	9.99081	10.0115	9.63116	9.54279	0.495695	1.74846	-0.286304	-0.621488	-0.340075	-0.234465
NP_005908	P40925	Malate dehydrogenase, cytoplasmic	9.64686	9.53971	9.05311	9.23003	9.96081	8.6081	9.60969	9.21396	9.31323	9.43107	9.48634	9.64692	0.903038	0.773996	0.298658	-0.68966	-0.184425	0.15056
NP_005909	P40926	Malate dehydrogenase, mitochondrial precursor	8.98024	9.22244	9.16872	9.04977	8.89887	9.52784	8.96657	8.89786	9.04319	9.17899	9.14776	9.24455	1.26303	0.613532	0.263034	-0.473931	-0.395929	-0.736966
NP_005947	P11586	C-1-tetrahydrofolate synthase, cytoplasmic	9.36175	9.16374	8.57296	9.00196	9.33089	9.04544	8.97376	8.84243	8.85988	8.94397	8.73209	8.41689	0.137504	0.0426443	-0.251539	-0.168123	0.443607	0.189034
NP_005955	P35580	Myosin-10	10.3373	9.10999	7.93862	8.98654	9.55057	8.00975	9.08714	9.60813	9.61337	9.19891	9.52969	9.0789	0.0840643	-0.340075	-0.136062	0.799087	2.89724	0.757023
NP_006102	P42765	3-ketoacyl-CoA thiolase, mitochondrial	10.8003	10.0105	9.65106	10.5553	10.1456	9.87951	10.8288	10.4448	10.6804	10.8416	10.5214	10.6252	0.555816	-0.0291463	-0.184425	0.378512	0.454176	-0.358454
NP_006108	O75521	Peroxisomal 3,2-trans-enoyl-CoA isomerase	11.5099	11.3189	9.67435	12.1929	11.5494	10.202	12.1063	12.1163	12.0573	11.7541	11.7404	11.7381	0.356144	0.632268	0.0426443	2.82171	1.18269	-0.0291463
NP_006187	O19048	Poly(rC)-binding protein 1	11.4027	11.2504	11.2945	10.9163	10.5274	11.6196	10.9553	10.8833	11.0513	11.2421	10.9732	11.465	0.226509	0.214125	-0.340075	-0.184425	0.565597	-0.104697
NP_006280	Q9Y490	Talin-1	8.84889	8.74427	9.13511	8.15562	7.98168	9.20889	7.62404	8.00245	8.13825	8.30264	7.99299	8.28395	0.400538	0.275007	-0.234465	0.163499	-0.200913	0.0426443
NP_006358	Q01518	Adenylyl cyclase-associated protein 1	10.591	10.4702	11.0968	10.7465	10.299	11.1628	10.7736	10.8153	10.7644	10.4785	10.6228	10.3341	1.25701	0.575312	0.422233	-0.0144996	0.226509	1.29866
NP_006423	P61916	Epididymal secretory protein E1 precursor	11.5776	11.4097	11.6105	10.4353	10.5458	11.0488	10.7468	10.8579	11.3579	10.8938	10.6974	10.1996	1.60407	0.0840643	-0.286304	0.0976108	0.0565835	-0.200913
NP_006614	O43175	D-3-phosphoglycerate dehydrogenase	12.0173	11.3308	9.64663	11.4681	10.9241	10.6561	11.0388	11.0177	10.7802	11.3677	10.8838	10.8455	0.163499	0.0840643	0.9855	0.0143553	0.62293	-0.251539
NP_006624	Q13576	Ras GTPase-activating-like protein IQGAP2	9.0221	8.98654	8.7745	9.52297	8.8555	8.81312	9.02924	9.11176	8.97549	9.03219	9.0314	8.9335	0.378512	0.378512	-0.761213	0.400538	0.584963	-0.621488
NP_006648	O95954	Formimidoyltransferase-cyclodeaminase	10.0756	9.88966	10.0063	10.1178	10.6126	10.1361	12.0198	12.3553	12.1817	12.6132	12.1179	11.6686	-1.59946	0.163499	-0.37707	-0.0439433	0.613532	0.31034
NP_008855	Q6PDM2	Splicing factor, arginine/serine-rich 1	8.66472	8.6297	8.63349	9.10321	8.75162	9.03412	8.98329	8.90595	8.55452	8.59078	8.42534	8.9864	0.941106	-1.08927	-0.535332	-0.136062	0.641546	0.594549
NP_009057	P55072	Transitional endoplasmic reticulum ATPase	10.8137	10.8524	10.555	10.6726	10.5374	11.1046	10.4287	10.3561	10.5248	10.5245	10.4672	10.7007	0.9855	0.659925	0.286881	-0.152003	0.678072	0.650765
NP_009193	Q99497	Protein DJ-1	12.6143	12.6631	12.2634	12.6662	12.4457	12.2784	12.5805	12.6457	12.8421	12.8669	13.0413	12.8383	0.454176	0.739848	0.422233	-0.785875	0.0143553	-0.415037
NP_036322	O75891	10-formyltetrahydrofolate dehydrogenase	10.409	10.3029	9.41511	9.8231	10.1259	9.9062	9.18809	9.36724	9.11187	9.82622	9.47915	9.09387	0.659925	0.918386	0.485427	-1.25154	-0.514573	-0.304006
NP_036386	Q9Y2P5	Bile acyl-CoA synthetase	12.4219	12.6107	11.7433	11.9675	11.0614	12.1193	12.8204	12.7274	12.747	13.0567	12.8812	12.774	-0.217591	-0.340075	-0.268817	0.464668	1.25701	0.0285692
NP_054752	Q96IZ6	Hypothetical 33.8 kDa protein in TWT1-FLO5 intergenic region	11.6908	11.756	10.6228	10.6734	11.6162	11.0554	11.7565	11.6646	11.5993	11.6617	11.4937	11.4891	0.505891	-0.234465	-1.02915	0.632268	1.01436	-0.0740006
NP_055049	Q92506	Estradiol 17-beta-dehydrogenase 8	11.5894	11.3905	11.0867	11.6351	11.7178	11.9336	11.3836	11.2393	11.5323	11.6945	11.5555	11.5071	0.695994	0.367371	-0.0588937	0.669027	0	-0.666576
NP_055635	O94826	Mitochondrial precursor proteins import receptor	10.0341	9.98543	9.76039	10.7419	9.79885	10.4457	10.4828	10.7087	10.3992	10.1707	10.0921	10.4913	0.695994	-0.494109	-0.184425	-1.4344	-1.25154	-1
NP_055866	Q9BS26	Thioredoxin domain-containing protein 4 precursor	8.3913	8.19786	8.57583	8.54623	8.03689	8.68014	8.29764	8.36449	8.27162	8.31944	8.13598	8.43636	-1.02915	-0.454032	-0.0144996	-0.168123	-0.104697	-3.8365
NP_057086	Q8NBX0	Probable saccharopine dehydrogenase	12.4842	12.4137	12.1484	12.6722	11.6239	12.2119	12.2598	11.9611	12.1852	12.2746	12.0939	12.3063	0.0426443	-0.268817	-0.68966	0.575312	-0.152003	-1.05889
NP_057128	Q59050	Hypothetical protein MJ1656	11.3932	11.2228	11.3823	11.1022	10.3473	11.6253	10.7602	10.6309	10.971	11.2373	10.9862	11.0228	1.07039	0.378512	0.163499	-0.514573	0	1.9855
NP_057370	Q7Z4W1	L-xylulose reductase	13.2117	13.3924	12.5834	13.6186	13.5718	13.164	13.8787	13.9048	13.963	14.1635	14.0609	14.3958	-1.35845	-0.415037	-1.35845	0.0285692	0.704872	0.411426
NP_060368	P75863	Hypothetical protein ycbX	12.0053	11.7022	11.7963	12.0867	11.0093	11.9464	11.6395	11.4431	11.3345	11.636	11.2427	11.0951	0.887525	0.163499	-0.184425	0.411426	0.163499	-0.556393
NP_060979	Q96AG4	Leucine-rich repeat-containing protein 59	7.92236	7.78052	7.75721	7.97284	7.74467	8.20479	7.88072	7.76345	7.98774	7.97558	8.14243	8.22123	0.411426	0.286881	-0.415037	0.0840643	-0.395929	0.124328
NP_066953	P62941	Peptidyl-prolyl cis-trans isomerase A	11.8668	12.0309	11.7867	12.2431	12.189	11.7972	11.9383	11.8993	12.0656	12.1538	12.0645	12.5075	0.85599	0.389567	0.422233	-0.395929	-0.184425	-0.184425
NP_066964	P13010	ATP-dependent DNA helicase 2 subunit 2	7.84482	7.79948	7.55965	8.45638	7.98388	7.68934	8.47603	8.69184	8.13982	8.87163	7.98179	8.13113	0.807355	-0.152003	-0.810966	0.111031	0.505891	-1.32193
NP_068776	P54840	Glycogen [starch] synthase, liver	11.3107	10.8626	8.43266	11.915	10.6809	9.1043	11.8076	12.094	11.7252	11.4957	11.2271	11.412	0.0426443	0.0840643	-0.785875	0.189034	1.01436	0.201634
NP_072090	P19059	2-hydroxymuconic semialdehyde dehydrogenase	11.8133	12.2422	12.5144	11.898	11.563	11.2359	12.3682	12.3502	12.5244	12.489	12.5339	12.4975	-1.68966	-0.340075	-0.599462	0.214125	0.0143553	-0.415037
NP_112574	Q9BRR6	ADP-dependent glucokinase	9.05607	8.61347	8.53074	8.57245	9.04681	8.99783	8.98162	8.87874	9.00966	9.046	9.08636	9.03783	0.321928	1.30451	0.695994	-1.32193	-0.454032	-0.0291463
NP_115679	P14802	Hypothetical oxidoreductase yoxD	9.1066	8.65124	7.48437	8.93351	7.526	8.23121	9.08464	8.88733	8.39598	8.74477	8.85802	8.58065	0.765535	-0.200913	-0.454032	0.124328	0.31034	-0.473931
NP_612461	Q96LJ7	Dehydrogenase/reductase SDR family member 1	9.20719	8.92269	8.64173	9.13593	8.63729	8.95451	8.92374	8.805	8.96628	9.35738	8.71798	8.67108	-3.64386	-1.47393	-0.0291463	0.536053	0.475085	0.584963
XP_292820	Q8IWN7	Retinitis pigmentosa 1-like 1 protein	9.92052	9.54465	9.22216	9.58004	10.087	9.61194	9.05746	9.03531	8.97077	9.3108	9.34102	8.88733	-0.0291463	-0.0439433	-0.0439433	1.09085	0.495695	-0.862496
XP_371369	O15320	Cutaneous T-cell lymphoma-associated antigen 5	8.79688	8.56509	7.86198	8.56022	8.19951	7.94587	9.59365	9.41416	9.22121	9.38808	9.13369	9.02499	0.137504	-0.713119	-1.18442	0.454176	0.214125	0.422233
* mRNA expression levels were calculated using robust multi-array average (RMA) function incorporated in the Bioconductor "affy" package (http://www.bioconductor.org/)
** Protein expression levels were calculated as a base-two logarithm transformed ratio of the sample expression level to the expression level of the common reference
