# Supplementary material for: Comparison of Protein and mRNA Expression Evolution in Humans and Chimpanzees
Source: PLoS One. 2007 Feb 14;2(2):e216. doi: 10.1371/journal.pone.0000216 (PMC1789144; doi:10.1371/journal.pone.0000216)
Supplement: Table S5 — Functional annotation of 33 genes with significant expression difference between humans and chimpanzees (0.03 MB XLS) [file pone.0000216.s010.xls]

## Sheet: Sheet1
Table S5. Functional annotation of 33 genes with significant expression difference between humans and chimpanzees
RefSeq. ID	UniProt SwissProt	mRNA differencea	Protein differenceb	Protein Name	GO description			.
					mol. function	cell. component	biol. process	.
NP_000021	P21549	yes	yes	Serine--pyruvate aminotransferase	alanine-glyoxylate transaminase activity protein binding; protein homodimerization activity; pyridoxal phosphate binding; serine-pyruvate transaminase activity; transaminase activity; transferase activity	mitochondrion; peroxisome	glyoxylate metabolism;metabolism; protein targeting to peroxisome	.
NP_000445	P60052		yes	Superoxide dismutase [Cu-Zn]	antioxidant activity; copper ion binding;copper, zinc superoxide dismutase activity;metal ion binding; oxidoreductase activity; zinc ion binding	cytoplasm	nervous system development; response to oxidative stress; superoxide metabolism	.
NP_000659	Q5I0R0		yes	alcohol dehydrogenase 1B (class I), beta polypeptide	alcohol dehydrogenase activity, zinc-dependent [pmid 9982]; electron carrier activity [pmid 2398055]; metal ion binding; zinc ion binding [pmid 9982]		ethanol oxidation [pmid 2398055]"	.
NP_000661	P08319		yes	Alcohol dehydrogenase 4	alcohol dehydrogenase activity [pmid 3036213]; electron-transferring-flavoprotein dehydrogenase activity [pmid 3466164]; metal ion binding; oxidoreductase activity; zinc ion binding		alcohol metabolism [pmid 3466164]; aldehyde metabolism [pmid 3466164]; ethanol oxidation	.
NP_000680	P00352		yes	Retinal dehydrogenase 1	aldehyde dehydrogenase (NAD) activity [pmid 1709013]; androgen binding [pmid 1709013]; oxidoreductase activity; Ras GTPase activator activity [pmid 1709013]; retinal dehydrogenase activity	cytoplasm [pmid 2987944]	aldehyde metabolism [pmid 1709013]; metabolism	.
NP_000911	P11498	yes		Pyruvate carboxylase, mitochondrial precursor	ATP binding [pmid 8048912]; biotin binding[pmid 8048912]; ligase activity; manganese ion binding;nucleotide binding; pyruvate carboxylase activity	cytoplasm; mitochondrion	gluconeogenesis; lipid biosynthesis;metabolism	.
NP_000980	P62890	yes		60S ribosomal protein L30	structural constituent of ribosome	intracellular; ribosome	protein biosynthesis	.
NP_001015	P63221	yes		40S ribosomal protein S21	ribosome binding; structural constituent of ribosome [pmid 15883184]	cytosolic small ribosomal subunit (sensu Eukaryota) [pmid 15883184]; intracellular; ribosome	cell differentiation [pmid 7786314]; cell proliferation; protein biosynthesis [pmid 15883184]	.
NP_001054	P02787	yes		Serotransferrin precursor	ferric iron binding; metal ion binding	endocytic vesicle [pmid 15229288] [pmid 15292400]; extracellular region [pmid 14718574]	ion transport; iron ion homeostasis; iron ion transport	.
NP_001076	P01011	yes	yes	Alpha-1-antichymotrypsin precursor	chymotrypsin inhibitor activity [pmid 9880565]; DNA binding [pmid 9880565]; protein binding[pmid 12709365] [pmid 14687906]	extracellular region [pmid 9880565] [pmid 14718574]; intracellular [pmid 9880565]	acute-phase response; inflammatory response[pmid 12475184]; regulation of lipid metabolism [pmid 11835318]	.
NP_001600	P45954		yes	Short/branched chain specific acyl-CoA dehydrogenase, mitochondrial precursor	acyl-CoA dehydrogenase activity [pmid 7698750]; FAD binding	mitochondrion [pmid 7698750]	electron transport; fatty acid metabolism[pmid 7698750]; lipid metabolism; metabolism	.
NP_001613	P02765	yes		Alpha-2-HS-glycoprotein precursor	cysteine protease inhibitor activity; kinase inhibitor activity [pmid 12203945]	extracellular region [pmid 14718574];extracellular space [pmid 11922920]	acute-phase response [pmid 12153747]; negative regulation of bone mineralization; negative regulation of insulin receptor signaling pathway [pmid 12153747]; pinocytosis [pmid 12773197]; positive regulation of phagocytosis [pmid 12725640]; regulation of inflammatory response [pmid 12642050]; skeletal development [pmid 12153747]	.
NP_001704	Q93088	yes		Betaine--homocysteine S-methyltransferase	betaine-homocysteine S-methyltransferase activity [pmid 10075673]; homocysteine S-methyltransferase activity [pmid 8798461]; metal ion binding; methyltransferase activity; transferase activity; zinc ion binding		protein amino acid methylation [pmid 10075673]; regulation of homocysteine metabolism [pmid 10075673]	.
NP_001986	P33121		yes	Long-chain-fatty-acid--CoA ligase 1	ligase activity; long-chain-fatty-acid-CoA ligase activity [pmid 1531127]; magnesium ion binding	integral to membrane; membrane; peroxisome	digestion [pmid 1531127]; fatty acid metabolism; lipid metabolism; metabolism	.
NP_002017	P02751		yes	Fibronectin precursor	collagen binding [pmid 3024962]; extracellular matrix structural constituent; heparin binding [pmid 10075919]; oxidoreductase activity		acute-phase response; cell adhesion [pmid 1423622]; cell migration; metabolism; response to wounding [pmid 7989369]; transmembrane receptor protein tyrosine kinase signaling pathway [pmid 15609325]	.
NP_002854	P06737		yes	Glycogen phosphorylase, liver form	glycogen phosphorylase activity [pmid 9529348]; nucleotide binding; phosphorylase activity; pyridoxal phosphate binding; transferase activity,transferring glycosyl groups		carbohydrate metabolism; glycogen metabolism	.
NP_002991	P21912	yes		Succinate dehydrogenase [ubiquinone] iron-sulfur protein, mitochondrial precursor	2 iron, 2 sulfur cluster binding; 3 iron, 4 sulfur cluster binding; 4 iron, 4 sulfur cluster binding; electron carrier activity; iron ion binding; metal ion binding; succinate dehydrogenase (ubiquinone) activity	membrane; mitochondrion [pmid 2302193]	electron transport; transport; tricarboxylic acid cycle [pmid 2302193]	.
NP_003118	Q13813		yes	Spectrin alpha chain, brain	actin binding [pmid 2307671]; calcium ion binding; calmodulin binding; structural constituent of cytoskeleton [pmid 2307671]	cytoskeleton; membrane; membrane fraction [pmid 2307671]; spectrin	barbed-end actin filament capping	.
NP_004083	P30084		yes	Enoyl-CoA hydratase, mitochondrial precursor	enoyl-CoA hydratase activity [pmid 9073515]; lyase activity	mitochondrion [pmid 16130169]	fatty acid beta-oxidation [pmid 9073515]; fatty acid metabolism; generation of precursor metabolites and energy; lipid metabolism; metabolism	.
NP_004125	P38646	yes		Stress-70 protein, mitochondrial precursor	ATP binding; nucleotide binding; unfolded protein binding [pmid 16130169]	cell surface [pmid 12493773]; cytoplasm [pmid 7684501]; mitochondrion [pmid 16130169]	anti-apoptosis [pmid 16130169]; protein folding	.
NP_004160	P34896	yes	yes	Serine hydroxymethyltransferase, cytosolic	glycine hydroxymethyltransferase activity; transferase activity	cytosol [pmid 8505317]	glycine metabolism; L-serine catabolism; L-serine metabolism; one-carbon compound metabolism	.
NP_004896	P30041		yes	Peroxiredoxin-6	hydrolase activity; oxidoreductase activity; peroxiredoxin activity; phospholipase A2 activity [pmid 10893423]	cytosol [pmid 9497358]; lysosome	lipid catabolism; phospholipid catabolism [pmid 10893423]; response to oxidative stress [pmid 10893423]	.
NP_005132	P02675		yes	Fibrinogen beta chain precursor		extracellular region [pmid 14718574]; fibrinogen complex [pmid 6688356]; soluble fraction [pmid 6688356]	blood coagulation; blood pressure regulation; positive regulation of cell proliferation	.
NP_005134	P00738		yes	Haptoglobin precursor	hemoglobin binding; serine-type endopeptidase activity	extracellular region [pmid 14718574]	defense response [pmid 7036344]; iron ion homeostasis; proteolysis	.
NP_005262	P00367		yes	Glutamate dehydrogenase 1, mitochondrial precursor	ATP binding; glutamate dehydrogenase activity [pmid 15578726]; glutamate dehydrogenase [NAD(P)+] activity; GTP binding; nucleotide binding; oxidoreductase activity	mitochondrion [pmid 15578726]	mitochondrion [pmid 15578726]	.
NP_005827	P52758	yes	yes	Ribonuclease UK114	endonuclease activity; hydrolase activity	cytoplasm [pmid 8530410]; nucleus [pmid 8530410]	regulation of translational termination [pmid 8530410]	.
NP_005908	P40925		yes	Malate dehydrogenase, cytoplasmic	L-lactate dehydrogenase activity; L-malate dehydrogenase activity; malic enzyme activity [pmid 8786100]; oxidoreductase activity	cytosol [pmid 8786100]	glycolysis; malate metabolism; tricarboxylic acid cycle	.
NP_005909	P40926		yes	Malate dehydrogenase, mitochondrial precursor	L-lactate dehydrogenase activity; L-malate dehydrogenase activity; oxidoreductase activity	mitochondrial matrix; mitochondrion	glycolysis; malate metabolism; tricarboxylic acid cycle	.
NP_006648	O95954	yes		Formimidoyltransferase-cyclodeaminase	folic acid binding;formimidoyltetrahydrofolate cyclodeaminase activity; glutamate formimidoyltransferase activity; lyase activity; transferase activity	cytoplasm [pmid 10029623]	folic acid and derivative metabolism [pmid 10029623]; histidine metabolism; metabolism	.
NP_036322	O75891	yes	yes	10-formyltetrahydrofolate dehydrogenase	cofactor binding; formyltetrahydrofolate dehydrogenase activity; hydroxymethyl-, formyl- and related transferase activity; methyltransferase activity; oxidoreductase activity	cytoplasm	10-formyltetrahydrofolate catabolism [pmid 10204077]; biosynthesis; one-carbon compound metabolism; protein biosynthesis	.
NP_054752	P38892		yes	Hypothetical 33.8 kDa protein in TWT1-FLO5 intergenic region	methyltransferase activity; transferase activity			.
NP_057370	Q7Z4W1	yes	yes	L-xylulose reductase	L-xylulose reductase activity; oxidoreductase activity	membrane	carbohydrate metabolism; D-xylose metabolism; glucose metabolism; metabolism	.
NP_066953	P62941		yes	Peptidyl-prolyl cis-trans isomerase A	isomerase activity; peptide binding; peptidyl-prolyl cis-trans isomerase activity; unfolded protein binding [pmid 2644542]; virion binding [pmid 11250896]		protein folding [pmid 2179953] [pmid 2644542]; regulation of viral genome replication [pmid 7590732] [pmid 11250896]	.
a Genes with significant mRNA expression difference
b Genes with significant protein expression difference
* mRNA expression levels were calculated using robust multi-array average (RMA) function incorporated in the Bioconductor "affy" package (http://www.bioconductor.org/)
** Protein expression levels were calculated as a base-two logarithm transformed ratio of the common reference expression level to the expression level of the sample
